**Title:** Temporal analysis of enhancers during mouse brain development reveals dynamic regulatory function and identifies novel regulators of cerebellar development.

**Authors:** Miguel Ramirez<sup>1,2</sup>, Yuliya Badayeva<sup>1,2</sup>, Joanna Yeung<sup>1,2</sup>, Joshua Wu<sup>1,2</sup>, Erin Yang<sup>1,2</sup>, FANTOM 5 Consortium<sup>3</sup>, Brett Trost<sup>4</sup>, Stephen W. Scherer<sup>4</sup>, Daniel Goldowitz<sup>1,2\*</sup>

**Author Affiliations:** 1. Centre for Molecular Medicine and Therapeutics, BC Children's Hospital Research Institute, Vancouver, BC, Canada V6H 3V5; 2. University of British Columbia, Vancouver, BC, Canada V6T 1Z4; 3. RIKEN, 2-1 Hirosawa, Wako, Saitama 351-0198, Japan; 4. The Centre for Applied Genomics, The Hospital for Sick Children, Toronto, ON, Canada M5G 0A4

**Corresponding Author:** Daniel Goldowitz, Centre for Molecular Medicine and Therapeutics, BC Children's Hospital Research Institute, 950 W 28th Ave, Vancouver, BC, Canada V6H 3V5

**Classification:** Biological Sciences, Developmental Biology

**Keywords:** Enhancers, Brain development, Gene expression regulation, Epigenetics, Transcription factors, Mouse, Autism Spectrum Disorder

## 1 **Abstract**

2           In this study, we identified active enhancers in the mouse cerebellum at embryonic and  
3 postnatal stages establishing the first catalog of enhancers active during embryonic cerebellum  
4 development. The majority of cerebellar enhancers have dynamic activity between embryonic  
5 and postnatal development. Cerebellar enhancers were enriched for neural transcription factor  
6 binding sites with temporally specific expression. Putative gene targets displayed spatially  
7 restricted expression patterns, indicating cell-type specific expression regulation. Functional  
8 analysis of target genes indicated that enhancers regulate processes spanning several  
9 developmental epochs such as specification, differentiation and maturation. We use these  
10 analyses to discover one novel regulator and one novel marker of cerebellar development:  
11 *Bhlhe22* and *Pax3*, respectively. We identified an enrichment of *de novo* mutations and variants  
12 associated with autism spectrum disorder in cerebellar enhancers. Our study provides insight into  
13 the dynamics of gene expression regulation by enhancers in the developing brain and delivers a  
14 rich resource of novel gene-enhancer associations providing a basis for future in-depth studies in  
15 the cerebellum.

## 16 17 **Introduction**

18           Neuronal development is a complex and dynamic process that involves the coordinated  
19 generation and maturation of countless cell types. For the most numerous neuron in the brain, the  
20 cerebellar granule cell, neuronal differentiation consists of several steps beginning with the  
21 commitment of neural stem cells to become specified neural precursors, followed by multiple  
22 migratory stages to reach and mature at its final destination (Consalez, Goldowitz, Casoni, &  
23 Hawkes, 2021). Underpinning these events is the expression of gene regulatory networks that  
24 drive dynamic molecular processes required for proper brain formation (Ziats, Grosvenor, &  
25 Rennert, 2015). However, the transcriptional mechanisms that precisely regulate these gene  
26 expression programs have not been fully described.

27           Gene expression is typically activated when transcription factors (TFs) bind to non-  
28 coding regulatory elements and recruit the necessary components to begin transcription. Among  
29 the several classes of non-coding sequences that regulate gene expression, enhancers are the  
30 most common, with thousands predicted to coordinate transcriptional regulation during  
31 development (Heinz, Sven, Romanoski, Benner, & Glass, 2015). Enhancers are stretches of DNA

32 that bind to TFs and upregulate distal target gene expression. In the brain, enhancers help to  
33 ensure that gene expression is spatially- and temporally-specific, defining what genes will be  
34 active during distinct stages of development (Nord & West, 2020). Transcriptional regulation by  
35 enhancers has been shown to be critical for cellular identity, maturation during central nervous  
36 system (CNS) development, and activity-dependent responses in mature neurons (Frank et al.,  
37 2015; Pattabiraman et al., 2014). A detailed understanding of the enhancers that govern changes in  
38 gene expression during embryonic and early postnatal brain development remains limited.  
39 Profiling genome-wide enhancer activity at different time points and identifying their gene  
40 regulatory targets can provide insight into developmental processes regulated by enhancer  
41 elements.

42 Several molecular properties have been associated with enhancer activity, and the  
43 advancement of sequencing technology has facilitated their identification genome-wide in  
44 several developing brain structures (Carullo & Day, 2019). Enhancers are marked with histone  
45 post-translational modifications H3K4me1 and H3K27ac, both of which contribute to opening  
46 chromatin for TF binding (Calo & Wysocka, 2013). H3K27ac delineates active from poised  
47 elements, and has been a reliable marker for enhancer activity genome-wide (Creyghton et al.,  
48 2010). Analysis of these marks, in conjunction with transcriptomic and epigenomic datasets, has  
49 revealed that the vast majority of non-coding variants associated with neurological and  
50 psychiatric disorders are found within these regulatory elements, highlighting their importance in  
51 functional readout in the brain (Barešić, Nash, Dahoun, Howes, & Lenhard, 2020). Thus, profiling  
52 enhancer-associated histone modifications in the brain across time provides a comprehensive  
53 understanding of gene-regulatory principles, disease-associated variants, and the genetics of  
54 brain development (Nott et al., 2019).

55 The cerebellum has been a long-standing model to study the developmental genetics of  
56 the brain. This is, in part, due to the limited number of cell types, well-defined epochs of  
57 development for these cell types and a simple trilaminar structure in which these cells are  
58 organized, making for an enhanced resolution of events in time and space (Wang, V. Y. & Zoghbi,  
59 2001). More recently, the study of cerebellar development has gained added interest through its  
60 documented role in the etiology of ASD (Stoodley & Limperopoulos, 2016). Previously, we  
61 developed a 12-timepoint transcriptional analysis of the developing cerebellum leading to the  
62 discovery of novel TFs critical for proper development (Zhang, P. G. Y. et al., 2018). More

63 recently, the developing cerebellum has served as an ideal setting for pioneering single-cell  
64 RNA-seq time course studies (Carter et al., 2018; Peng et al., 2019; Wizeman, Guo, Wilion, & Li,  
65 2019). At the level of gene expression regulation, chromatin accessibility and enhancer activity  
66 have been examined previously in the postnatal cerebellum, leading to the discovery of distinct  
67 transcriptional profiles between immature and mature neurons, coordinated by non-coding *cis*-  
68 regulatory sequences (Frank et al., 2015). However, a comprehensive atlas of enhancers defining  
69 the role they play during embryonic and early postnatal cerebellar development has yet to be  
70 established. Profiling these non-coding regulatory elements and their target genes will discover  
71 novel genetic drivers of the precisely-timed and cell-specific molecular events in the developing  
72 cerebellum.

73 We utilize chromatin immunoprecipitation followed by sequencing (ChIP-seq) of  
74 enhancer associated histone marks H3K4me1 and H3K27ac at 3 stages of embryonic and early  
75 postnatal cerebellar development. We identify temporally specific enhancers using a differential  
76 peak analysis comparing postnatal and embryonic timepoints. Transcription factor motif  
77 enrichment and prediction of gene targets led to the elucidation of molecular processes regulated  
78 by enhancers during these stages. We use these analyses to discover two novel regulators of  
79 cerebellar development, Pax3 and Bhlhe22: a novel marker of GABAergic progenitors and a  
80 regulator of postnatal granule cell migration, respectively. Finally, we identify an enrichment of  
81 autism spectrum disorder (ASD) associated SNPs and *de novo* variants found in ASD-affected  
82 individuals in cerebellar enhancers, functionally annotating ASD-associated variation. Our study  
83 provides further insight into the dynamics of gene expression regulation by enhancers in the  
84 developing brain and delivers a rich resource to help understand the developmental and  
85 functional genetics of the developing cerebellum.

86

## 87 **Results**

### 88 **Enhancer identification during cerebellar development**

89 To identify enhancers active during embryonic and postnatal cerebellar development, we  
90 generated genome-wide H3K27ac and H3K4me1 ChIP-seq profiles from mouse cerebella  
91 dissected at embryonic day 12 (E12), postnatal day 0 (P0) and postnatal day 9 (P9) (**Figure 1A**).  
92 These developmental days represent 3 distinct stages of murine cerebellar development, each  
93 with its own developmental profile (Goldowitz & Hamre, 1998). H3K27ac and H3K4me1 signals

94 were reproducible between biological replicates as exemplified in a region on chromosome 14  
 95 (**Figure 1B**). There was a high correlation between replicates for both marks at each age  
 96 (**Supplementary Figure 1A**). Therefore, we had confidence in using our H3K27ac and  
 97 H3K4me1 data in downstream analyses. Robust cerebellar enhancers were identified by the  
 98 presence of overlapping peaks between the two enhancer-associated histone marks at each age.  
 99 This highlighted a total of 9,622 peaks; 5,859, 474, and 3,289 peaks that were in both the  
 100 H3K27ac and H3K4me1 datasets at E12, P0, and P9, respectively (**Figure 1C**). Duplicate peaks  
 101 between ages were removed, producing a list of **7,024** active cerebellar enhancers derived from  
 102 overlapping H3K27ac and H3K4me1 signals (Supplementary Data 1).  
 103

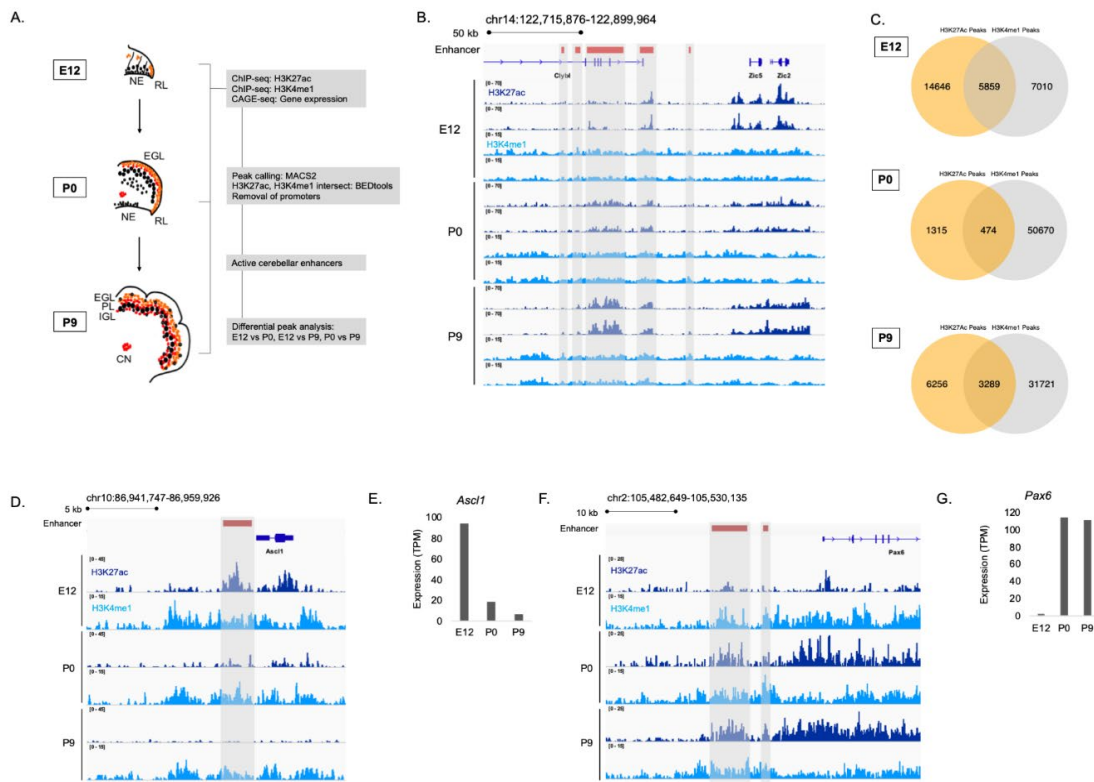

104

105 **Figure 1. Enhancer identification during cerebellar development.** **A)** An overview of the stages of cerebellar  
 106 development profiled in this study. The datasets collected at these ages and the downstream analyses are shown.  
 107 Labels: NE: Neuroepithelium, RL: Rhombic lip, EGL: External granular layer, PL: Purkinje layer, IGL: Inner  
 108 granular layer, CN: Cerebellar nuclei **B)** A region of the mouse genome chr14:122,715,876-122,899,964 (mm9) in  
 109 the Integrative Genomics Viewer (IGV) showing H3K27ac and H3K4me1 profiles across biological replicates of  
 110 E12, P0, P9 cerebella. Active cerebellar enhancers are highlighted (gray box). **C)** Venn diagrams displaying overlap  
 111 between H3K27ac and H3K4me1 peaks at each E12, P0 and P9. **D-E)** An example of a cerebellar enhancer  
 112 identified from the E12 cerebella. Shown is normalized H3K27ac and H3K4me1 signal at the enhancer (gray box),  
 113 as well as **(E)** normalized CAGE-seq expression of the nearest gene, *Ascl1*, across developmental time, at E12, P0,  
 114 P9. TPM, Transcripts Per Million. **(F-G)** An example of a cerebellar enhancer identified from the P9 cerebella.  
 115 Shown is normalized H3K27ac and H3K4me1 signal at the enhancer (gray box), as well as **(G)** normalized (TPM)  
 116 CAGE-seq expression of the nearest gene, *Pax6*, across developmental time, at E12, P0, P9.

117 The relationship between enhancer activity and genes relevant to cerebellar development  
118 is shown in genomic regions flanking *Ascl1* and *Pax6*, two genes critical to cerebellar  
119 development (Kim, Battiste, Nakagawa, & Johnson, 2008; Yeung, Ha, Swanson, & Goldowitz, 2016b).  
120 We identified an enhancer active at E12 located in close proximity to *Ascl1* (**Figure 1D**). A  
121 decrease in the H3K27ac ChIP-seq signal at this enhancer corresponded to a decrease in *Ascl1*  
122 gene expression (**Figure 1E**). We identified two active enhancers at P9 located near *Pax6*  
123 (**Figure 1F**). H3K27ac ChIP-seq signal also showed a pattern of activity similar to *Pax6*  
124 expression, increasing from embryonic to postnatal ages (**Figure 1G**). These results provide  
125 validation for the enhancers identified in our dataset in regulating genes critical to cerebellar  
126 development.

127 We compared our list of robust cerebellar enhancers to three previously published  
128 enhancer datasets. First, P7 H3K27ac ChIP-seq and DNase-seq profiles previously generated by  
129 Frank et al (2015) were compared to robust cerebellar enhancers. Greater than 90% of our  
130 reported cerebellar enhancers are replicated by H3K27ac and DNase-seq peaks from this study  
131 (**Supplementary Figure 1B-C**). Second, enhancers retrieved from the enhancer database  
132 EnhancerAtlas 2.0, reporting enhancer activity in the mouse cerebellum at P0-P14 (Gao & Qian,  
133 2020), were compared to robust cerebellar enhancers were compared to. We found that 73%, and  
134 80% of our enhancers overlapped with the postnatal cerebellum enhancer dataset at P0, and P9,  
135 respectively (**Supplementary Figure 1D**). Third, mouse enhancers that had experimentally  
136 validated hindbrain activity at E11.5 from the VISTA Enhancer Browser (Visel, Minovitsky,  
137 Dubchak, & Pennacchio, 2007) were compared to cerebellar enhancers. We found that 56% of  
138 VISTA enhancers overlap with our cerebellar enhancer sequences at E12 (**Supplementary**  
139 **Figure 1E**). These confirmative findings indicate our approach was effective in capturing active  
140 cerebellar enhancers.

141

## 142 **Enhancer dynamics during cerebellar development**

143 The dynamics of enhancer activity over cerebellar development were examined through a  
144 differential peak analysis of H3K27ac signal. The majority, **89% (6238/7023)**, of cerebellar  
145 enhancers had significant differences in peak signal (adjusted p-value  $\leq 0.05$ ) throughout  
146 cerebellar development (**Figure 2A**). At P9, **1273** cerebellar enhancers were significantly active  
147 compared to either P0 or E12 (Supplementary Data 2). At E12, **4432** active enhancers were

148 differentially active compared to either P9 or P0 (Supplementary Data 2). At P0, in contrast, only  
 149 a small number of enhancers with differential signal was identified (403 and 154 showed  
 150 significant changes when compared to E12 and P9, respectively). However, none of these P0  
 151 cerebellar enhancers were differentially active when compared to both E12 and P9, indicating  
 152 that enhancer activity did not spike at birth. Taken together, this analysis highlights two  
 153 temporally specific windows of enhancer activity at Early (embryonic) and Late (postnatal)  
 154 stages (**Figure 2B**).

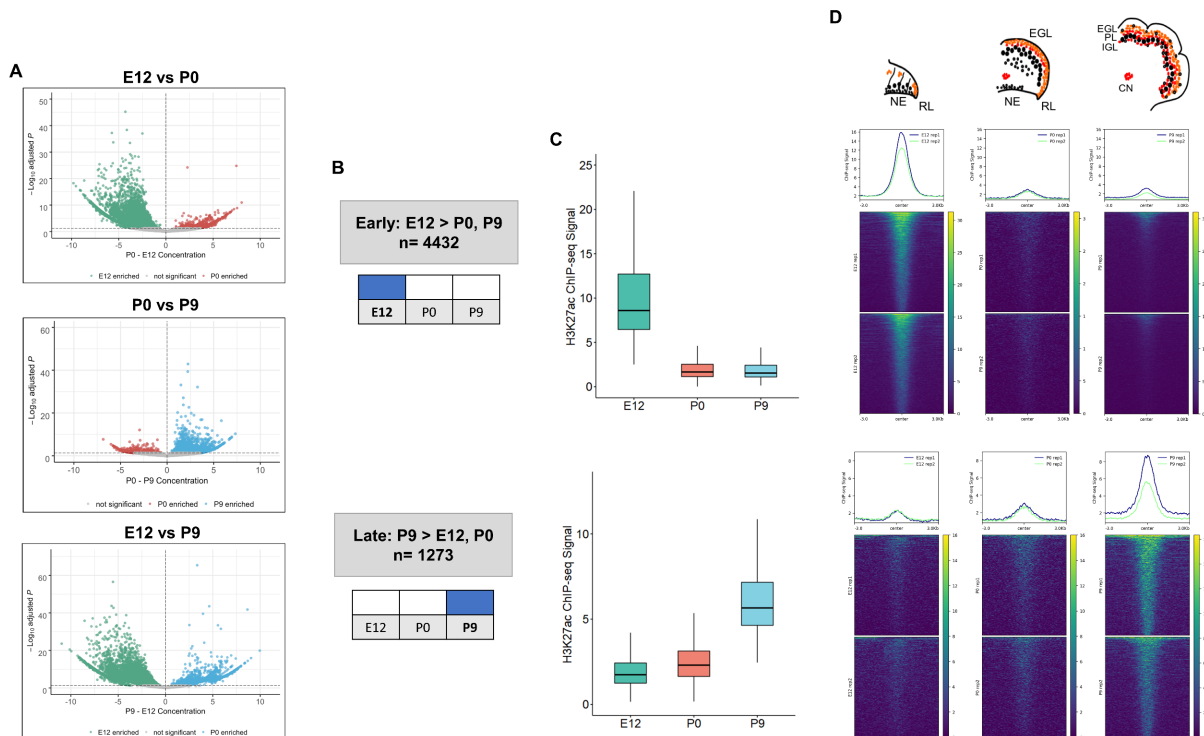

155  
 156 **Figure 2. Enhancer activity is dynamic throughout cerebellar development.** **A)** Volcano plots showing robust  
 157 cerebellar enhancers with differential H3K27ac peak signal for three comparisons: E12 vs P9, E12 vs P0, and  
 158 P0 vs P9. Differential signal strength was identified for 4433 and 4355 robust cerebellar enhancers when comparing E12  
 159 to P9 and to P0, respectively. At P9, 1275 and 403 robust cerebellar enhancers had differential signal when  
 160 compared to E12 and P0, respectively. Enhancers with significant differential activity are colored at a cutoff of an  
 161 adjusted p-value < 0.05. Displayed on the y-axis is the negative log<sub>10</sub> adjusted p-value and on the x-axis is the  
 162 difference in ChIP-seq signal between to the ages for a given peak. **B)** A diagram displaying how Early and Late  
 163 active cerebellar enhancers were classified based on differential peak analysis results. **C)** A boxplot showing mean  
 164 ChIP-seq signal (y-axis) for all Early (upper) and Late (lower) active enhancers. Error bars represent the standard  
 165 error of the mean. **D)** Mean profile and heatmaps of H3K27ac signal at the midpoint of our predicted cerebellar  
 166 enhancers (rows ± 3kb) in Early and Late groups at E12, P0 and P9.

167  
 168  
 169 Distinct patterns of enhancer activity were observed for temporally classified enhancers.  
 170 For Early active enhancers, there was a loss of mean H3K27ac signal over time, with a steep  
 171 decline after E12 (**Figure 2C**). Late active enhancers exhibited a gain in activity over time, with

172 mean H3K27ac signal increasing steadily through development. These patterns are seen when  
173 looking at the changes in signal flanking the summits of our peaks across time (**Figure 2D**).  
174 These results indicate that the majority of cerebellar enhancers are dynamic throughout time and  
175 exhibit temporally specific activity.

176

### 177 **Cerebellar enhancers are enriched for neural transcription factor binding sites in an age-** 178 **dependent manner**

179 We then sought to identify transcription factors whose activity is dictated by the  
180 availability of robust cerebellar enhancers, as many neural lineage-defining factors drive cell  
181 commitment in the developing brain through enhancer binding (Elsen et al., 2018; Lindtner et al.,  
182 2019). We used HOMER to search for enriched motifs (adjusted p-value < 1E-11) in Late and  
183 Early active cerebellar enhancers and then matched them to known transcription factor motifs in  
184 the JASPAR database (Heinz, S. et al., 2010). This analysis revealed a distinct set of significantly  
185 enriched motifs for Early and Late enhancers matching predicted TFs with both known and novel  
186 regulatory roles in cerebellar development (**Figure 3A**). TFs enriched in the Early active  
187 enhancers show a decrease in expression over time while TFs enriched in the Late active  
188 enhancer group show an increase in expression over time. This correspondence between enriched  
189 TF expression and enhancer activity provides validation for our findings and indicates the timing  
190 of enhancer activity may be dictated by the expression and binding of these enriched TFs.

191 The top three enriched TF motifs for Early active enhancers were *Ascl1*, *Meis2* and  
192 *Atoh1* (**Figure 3A**). These TFs have established roles in cerebellar development, acting as  
193 markers of GABAergic or glutamatergic cell types and regulators of differentiation (Ben-Arie et  
194 al., 1997; Kim et al., 2008; Wizeman et al., 2019). Importantly, many of the motifs enriched in the  
195 Early group matched with TFs which have received little to no attention in the cerebellum,  
196 including *Sox4*, *Lhx2*, *Rfx4*, *Pou3f1* and *Pax3* (**Figure 3A**). These TFs have been previously  
197 associated with the development of other brain areas (Frantz, Bohner, Akers, & McConnell, 1994;  
198 Porter et al., 1997; Su et al., 2016; Zhang, D. et al., 2006). In contrast, the TFs matching the motifs  
199 enriched in the Late active enhancers have a previously identified role in cerebellar development;  
200 but not necessarily involved in the same processes (**Figure 3A**). For example, the top 3 enriched  
201 motifs matched with *Neurod1*, *Nfia/b/x*, and *NF1*, which have all been associated with granule  
202 cell differentiation (Miyata, Maeda, & Lee, 1999; Sanchez-Ortiz et al., 2014; Wang, W. et al., 2007).



203 However, two other TFs with enriched binding sites, Pax6 and Smad4 have been found to be  
 204 critical for granule cell precursor proliferation, a process preceding differentiation (Swanson &  
 205 Goldowitz, 2011). These results suggest a dynamic role for the majority of our Early and Late  
 206 active enhancers, driven by TFs involved in distinct stages of neuron development.  
 207

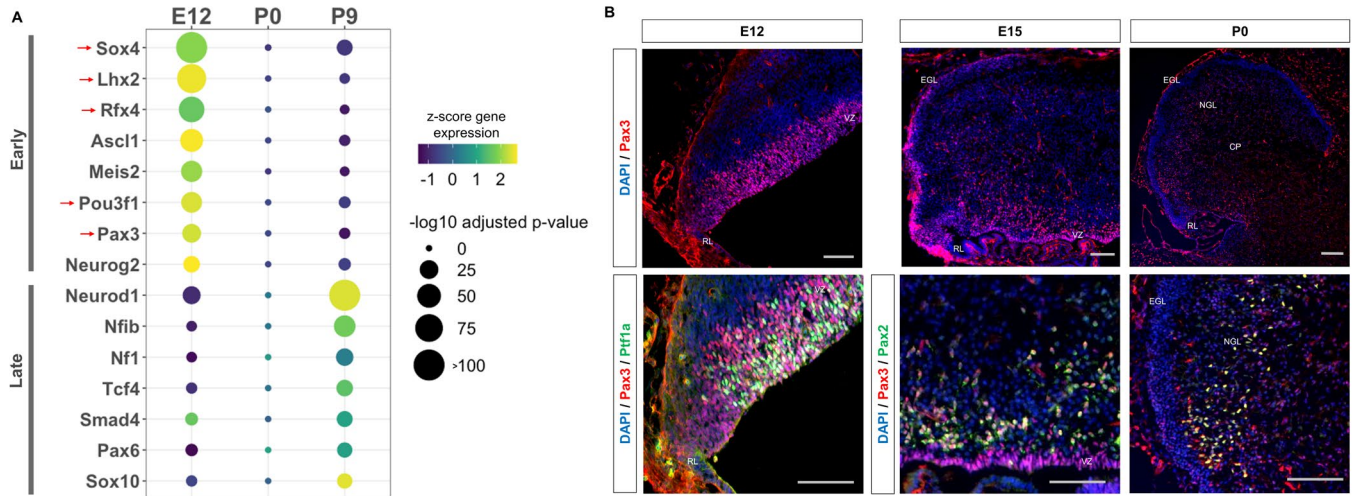

208  
 209 **Figure 3. Neural transcription factors with known and novel function in the developing cerebellum are**  
 210 **enriched in dynamic cerebellar enhancers.** **A)** Dot plot displaying significantly enriched (adjusted p-value < 1E-  
 211 11) motifs and the predicted matching transcription factor (TF). Displayed are the results for Early (top) and Late  
 212 (bottom) active enhancers. TFs with an unknown functional role in cerebellar development are indicated with a red  
 213 arrow. Size of the dots indicate the negative log10 adjusted p-value for a given motif and the color scale displays the  
 214 z-score normalized expression throughout the cerebellar developmental time course. **B)** Top: Immunofluorescent  
 215 staining of Pax3 in the mouse cerebellum at E12, E15 and P0. Bottom: Pax3 and Ptf1a immunofluorescent co-  
 216 staining of the E12 mouse cerebellum. Immunofluorescent co-staining of Pax3 and Pax2 in the mouse cerebellum at  
 217 E15 and P0. Labels: CP: Cerebellar parenchyma, EGL: External granular layer, NGL: Nascent granular layer, RL:  
 218 Rhombic lip, VZ: Ventricular zone, Scalebars = 100um.  
 219

220 **Early active enhancers are enriched for Pax3 binding sites, a novel marker for GABAergic**  
 221 **cells**

222 The TF motif enrichment analysis of Early enhancers led to the discovery of several TFs  
 223 with novel in the context of embryonic cerebellar development; potentially involved in seminal  
 224 aspects of development such as cellular specification or commitment. As a case study, we  
 225 focused on Pax3, as other members of the Pax protein family have been shown to play key roles  
 226 in the developing cerebellum (Leto et al., 2009; Urbánek, Fetka, Meisler, & Busslinger, 1997; Yeung,  
 227 Ha, Swanson, & Goldowitz, 2016a). Indeed, we observed robust expression in the ventricular zone  
 228 (VZ); a neural progenitor region for GABAergic cells in the cerebellum (Leto, Carletti, Williams,

229 Magrassi, & Rossi, 2006) (**Figure 3B**). Colocalization between Pax3 and Ptf1a, the GABAergic  
230 lineage-defining molecule in the cerebellum (Hoshino et al., 2005), confirmed expression within  
231 GABAergic neural progenitors. At E15, Pax3<sup>+</sup> cells are seen in the region just dorsal to the VZ,  
232 which consist of post-proliferative cells such as Purkinje cells and interneurons (Hoshino et al.,  
233 2005; Leto et al., 2006) (**Figure 3B**). We examined Pax3 co-labeling with markers for these cell  
234 types Foxp2 and Pax2, respectively (Fujita et al., 2008; Maricich & Herrup, 1999). While  
235 colocalization between Pax3 and Pax2 was found (**Figure 3B**), no co-staining between Pax3 and  
236 Foxp2 was observed (**Supplemental Figure 3A**). These results extend to P0, where Pax3<sup>+</sup> cells  
237 are found in the nascent granule cell layer as well as the cerebellar parenchyma; ie co-labeling  
238 with Pax2 and not Calbindin, a Purkinje cell marker (**Figure 3E, Supplemental Figure 3B**).  
239 Thus, Pax3 is a novel marker for GABAergic progenitors and interneuron precursors in the  
240 developing cerebellum.

241

#### 242 **Co-expressed putative target genes are expressed in spatially distinct areas of the** 243 **developing cerebellum.**

244 We next investigated the molecular processes regulated by robust cerebellar enhancers  
245 through predicting their downstream targets (Osterwalder et al., 2018; Yao et al., 2015). This was  
246 done by calculating the correlation between H3K27ac signal and gene expression at E12, P0, and  
247 P9 (Zhang et al., 2018) for genes located within the same conserved topological associating  
248 domain (TAD) identified previously (Dixon et al., 2012) (See Methods). Overall, at least one  
249 positively correlated target gene was identified for **5815/7023 (70.61%)** cerebellar enhancers  
250 with an average Pearson correlation coefficient of **0.86** (Supplementary Data 3). In total, we  
251 identified **2261** target genes. Using the Mouse Genome Informatics (MGI) database, we  
252 identified **98** target genes that when knocked out result in a cerebellar phenotype; demonstrating  
253 the validity of our high throughput approach.

254 An unbiased *k-means* clustering was then conducted for Early and Late target genes to  
255 delineate them into the various co-expression programs coordinating molecular events during  
256 development. For this analysis, the target gene expression time course was expanded to 12  
257 different timepoints during cerebellar development, quantified previously by CAGE-seq (Zhang  
258 et al., 2018). For Early active enhancers, 4 Clusters of co-expressed target genes were identified  
259 (**Figure 4A**). Genes in these clusters had decreased expression over time, similar to their

260 corresponding enhancer activity. However, a distinct mean expression profile was observed for  
 261 each Cluster (**Figure 4B**). Interestingly, genes with known function during cerebellar  
 262 development showed distinct spatial expression patterns, observed using ISH data from the  
 263 Developing Mouse Brain Atlas (Thompson et al., 2014) (**Figure 4C**).  
 264

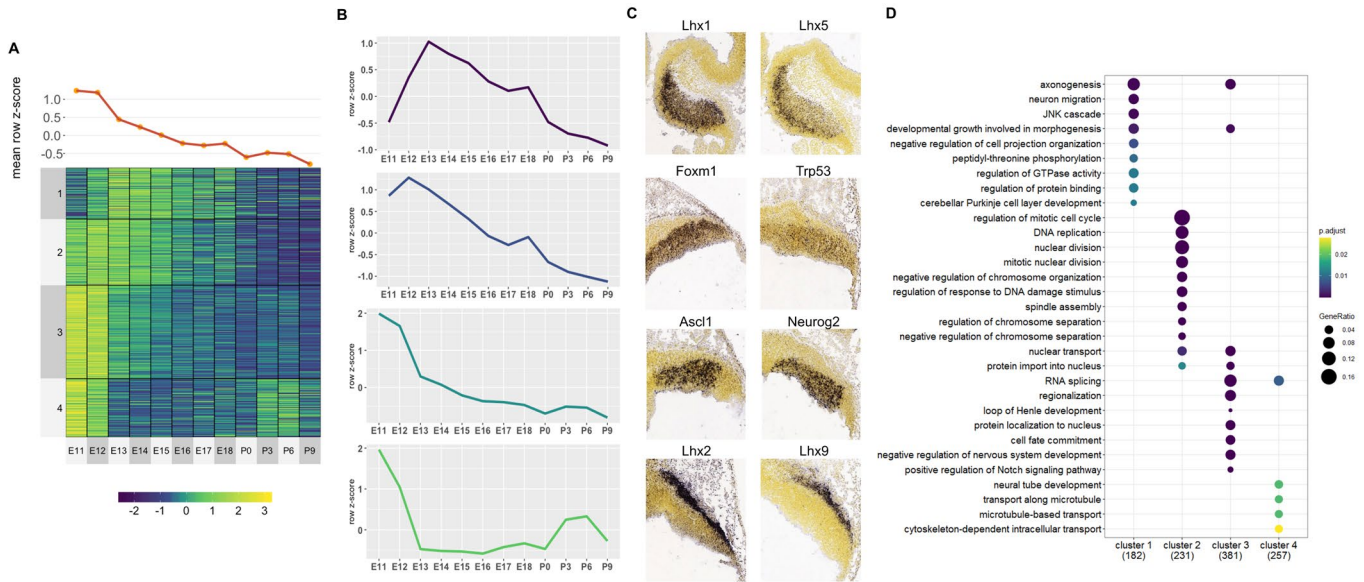

265

266 **Figure 4. Co-expressed Early target genes are expressed in spatially distinct areas and have diverse roles in**  
 267 **cerebellar development.** **A)** Line plot and heatmap showing mean z-score expression for Early target genes  
 268 throughout the cerebellar time course. **B)** Line graph representation of expression pattern throughout time for each  
 269 cluster. **C)** Known cerebellar genes in each cluster and *in situ* hybridization (ISH) images showing spatial expression  
 270 at peak expression ages. ISH images were taken from the Developing Mouse Atlas conducted at E13.5 for clusters 1  
 271 and 2, and E11.5 for clusters 3 and 4. **D)** Gene Ontology (GO) enrichment analysis of target genes from each cluster,  
 272 displaying the top enriched GO terms. Size of the dots indicates the gene ratio for a given cluster which is equal to  
 273 the number of genes within the GO category divided by the total number of genes in the cluster. Color scale  
 274 indicates the adjusted p-value for each GO term.

275 For example, in **Cluster 3**, cerebellar genes *Ascl1* and *Neurog2* are expressed exclusively  
 276 in the ventricular zone at E11.5 while **Cluster 4** contains *Lhx9* and *Meis2* which are expressed in  
 277 the Nuclear Transitory Zone (neurons destined for the cerebellar nuclei). A Gene Ontology (GO)  
 278 enrichment analysis revealed that each cluster is enriched for molecular processes known to be  
 279 regulated by cerebellar genes within the cluster (**Figure 4D**). For example, **Cluster 1** is enriched  
 280 for **axonogenesis** (GO:0007409, p-value: 3.31E-4), **neuron migration** (GO:0001764, p-value:  
 281 3.3E-4) and **Purkinje layer development** (GO:0021691, p-value: 0.01) and also contains *Lhx1*  
 282 and *Lhx5* which are expressed in migrating Purkinje cells in cerebellar parenchyma and has  
 283 previously been associated with the regulation of Purkinje cell differentiation during embryonic

284 cerebellar development (Zhao et al., 2007). Together, these findings support the notion that Early  
 285 active enhancers regulate their targets in a spatially-specific manner, regulating distinct processes  
 286 in their respective cell types.

287 For the Late active enhancers, 4 Clusters of co-expressed target genes were identified  
 288 (Figure 5A). We observed relatively distinct expression patterns in each of the 4 Clusters with a  
 289 gradual rise in mean expression throughout time (Figure 5B). Genes with known function during  
 290 cerebellar development also show distinct spatial expression patterns, identified using the  
 291 Developmental Mouse Atlas (Figure 5C). For example, Cluster 1 and 3 contained known  
 292 cerebellar genes critical for granule cell development, such as *Neurod1* and *Zic1*, while Cluster  
 293 2 and 4 contained cerebellar genes important for in Purkinje cell development, such as *Atxn1* and  
 294 *Hcn1* (Figure 5C) (Aruga & Millen, 2018; Ebner et al., 2013; Miyata et al., 1999; Rinaldi et al., 2013).

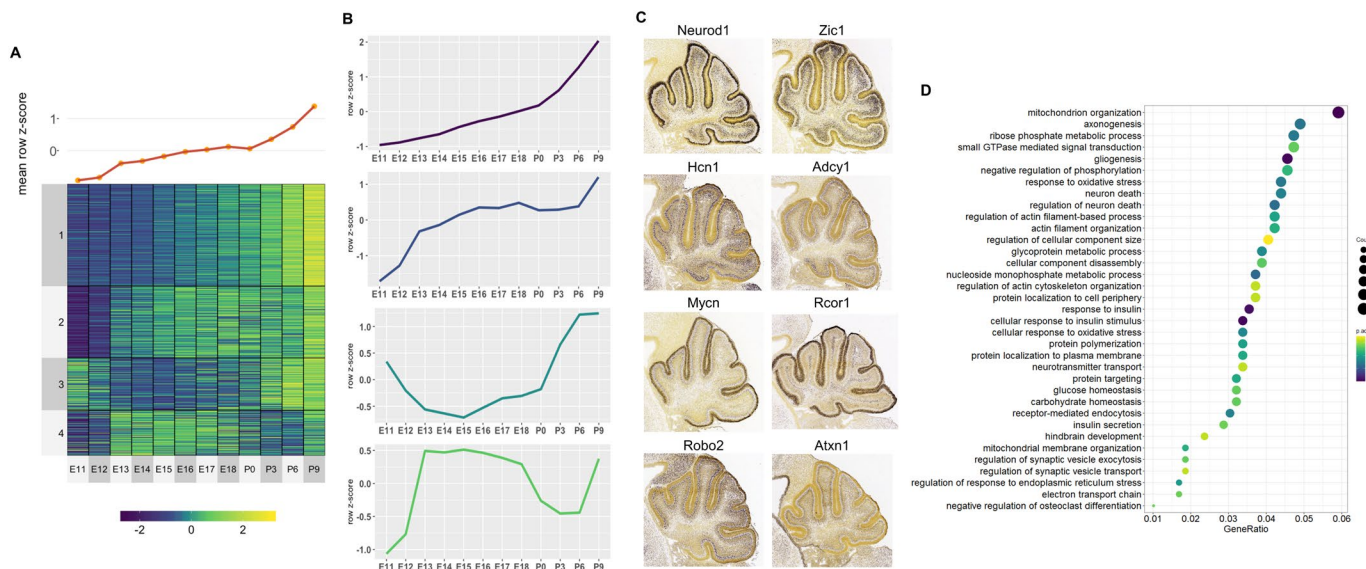

295

296 **Figure 5. Co-expressed Late target genes are expressed in developing granule cells or Purkinje cells with**  
 297 **common roles in cerebellar development.** A) Line plot and heatmap showing mean z-score expression throughout  
 298 the cerebellar time course. B) Line plot representation of expression pattern throughout time for each cluster. C)  
 299 Known cerebellar genes in each cluster and *in situ* hybridization showing spatial expression at peak expression ages.  
 300 ISH images were taken from the Developing Mouse Atlas provided by the Allen Brain Atlas conducted at P4.5 for  
 301 all clusters. D) Gene Ontology (GO) enrichment analysis of all target genes of Late active enhancers, displaying the  
 302 top enriched GO terms. Size of the dots indicates the number target genes within a given GO term and the gene ratio  
 303 (x-axis) is equal to the number of genes within the GO category divided by the total number of genes in the cluster.  
 304 Color scale indicates the adjusted p-value for each GO term.

305 A GO enrichment analysis was conducted for each Cluster; with no significantly  
 306 enriched Cluster-specific GO terms. However, if all Late enhancer target genes were combined,  
 307 several enriched GO terms emerged including ones involved in postnatal neuronal development,

308 such as **neuron death** (GO:0070997, p-value: 0.003), **neurotransmitter transport**  
309 (GO:0006836, p-value: 0.006) and **regulation of synaptic vesicle exocytosis** (GO:2000300, p-  
310 value: 0.005) (**Figure 5D**). Overall, this analysis provides a working framework for the  
311 placement of hundreds of genes into the overall structure of embryonic or postnatal cerebellar  
312 development

313

### 314 ***Bhlhe22* is a novel regulator of granule cell development**

315 To demonstrate the utility of our results, we sought to identify target genes not  
316 previously identified in cerebellar development. We focused on Late Cluster 1, which contained  
317 target genes expressed in granule cells. We hypothesized that genes within this cluster regulated  
318 postnatal granule cell differentiation. To identify genes in this cluster regulating granule cell  
319 development, we filtered these genes relative to their interaction with *Atoh1*, the lineage defining  
320 molecule for granule cells and other glutamatergic neurons in the developing cerebellum (Ben-  
321 Arie et al., 1997). The genes were filtered using the following criteria: 1) *Atoh1* is bound to the  
322 predicted enhancer during postnatal development (Klisch et al., 2011) and 2) the genes are  
323 differentially expressed in the *Atoh1*-null mouse (Klisch et al., 2011). Among the top 15 genes in  
324 the filtered list, we identified **4** novel genes and **11** genes that have previously been implicated in  
325 postnatal granule cell development (Supplementary Table 1). The known genes provided  
326 validation for our approach. The novel genes included *Bhlhe22* (also known as *Bhlhb5*), *Purb*,  
327 *Klf13* and *Sox18*. We focused particularly on *Bhlhe22* as it has previously been implicated in the  
328 differentiation of neurons in the cortex (Joshi et al., 2008). An enhancer ~2 kb upstream of the  
329 *Bhlhe22* transcriptional start site was identified and is bound by *Atoh1* during postnatal  
330 development (**Supplemental Figure 3A**). This enhancer displayed H3K27ac activity highly  
331 correlated (Pearson correlation coefficient = 0.98) to *Bhlhe22* expression, which consistently  
332 rises throughout cerebellar development and peaks at P9.5 (**Supplemental Figure 3B**).

333 To attain a cellular resolution of the expression pattern for *Bhlhe22* over developmental  
334 time, a time-course of protein expression using immunofluorescent staining spanning cerebellar  
335 development was conducted. *Bhlhe22* expression was observed in cells within the inner external

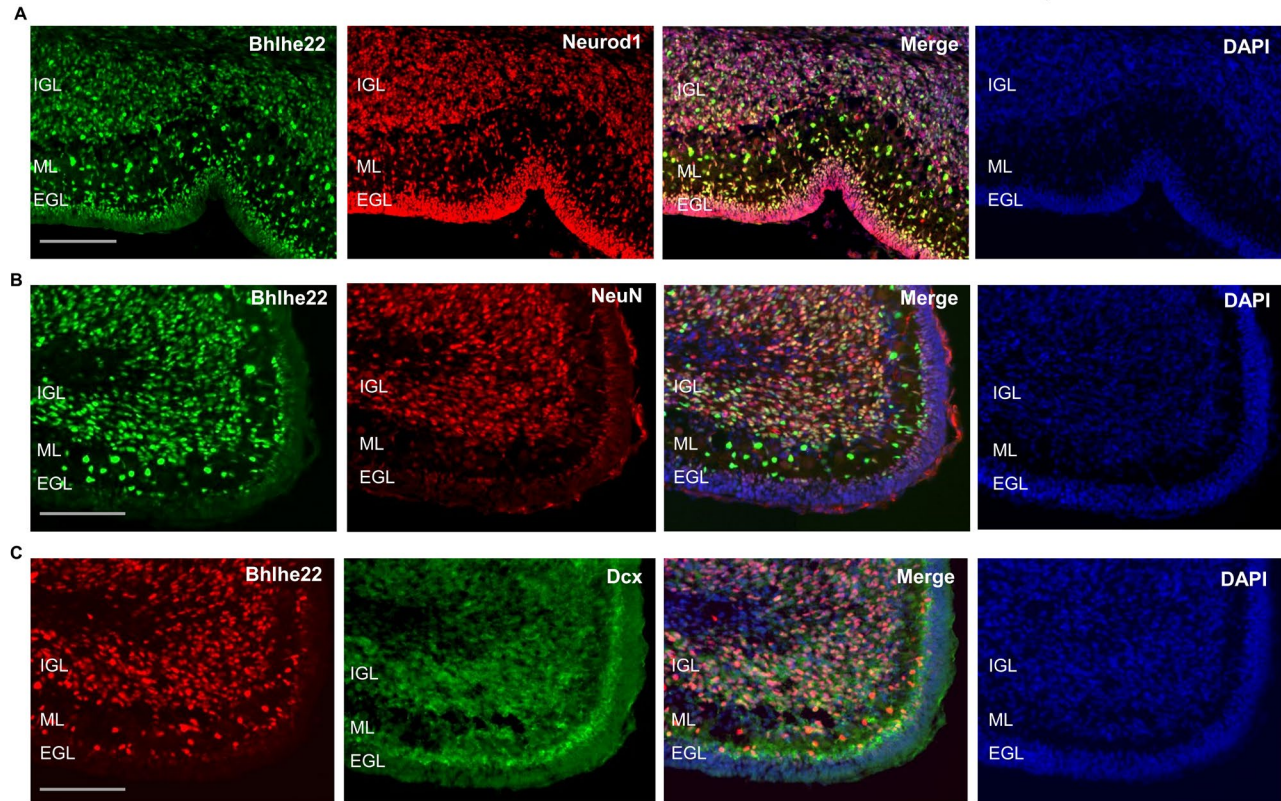

336  
337 **Figure 6. Bhlhe22 is expressed in differentiating granule cells in postnatal cerebellar development.** A) Bhlhe22  
338 (green) and Neurod1 (red) immunofluorescent co-staining at P9.5 of taken from a posterior lobe IX. B) Bhlhe22  
339 (green) and NeuN (red) immunofluorescence co-staining at P6 taken from posterior lobe IX. C) Bhlhe22 (red) and  
340 Dcx (green) immunofluorescent co-staining at P6 showing the posterior lobe IX; Labels: EGL= external granular  
341 layer IGL = inner granular layer, ML = molecular layer, Scalebars = 100um.

342  
343 granule layer (EGL), molecular layer and in the inner granule layer (IGL) of the postnatal  
344 cerebellum (**Figure 6A**). To identify whether Bhlhe22 is expressed in differentiating granule  
345 cells, co-staining experiments were performed with Neurod1 and NeuN which mark  
346 differentiating and mature granule cells, respectively (Miyata et al., 1999; Weyer & Schilling, 2003).  
347 At P6.5, colocalization between Bhlhe22 and Neurod1 was observed, indicating expression in  
348 differentiating and migrating granule cells (**Figure 6A**). Co-staining between Bhlhe22 and NeuN  
349 expression was also observed, indicating expression in maturing granule cells found within the  
350 IGL (**Figure 6B**). To confirm whether the Bhlhe22-positive cells within the molecular layer were  
351 migrating granule cells, we performed a double labelling experiment for a neuronal migration  
352 marker Doublecortin (Takács, Zaninetti, Vig, Vastagh, & Hámori, 2008). Colocalization between  
353 Doublecortin and Bhlhe22 was observed in cells within the inner EGL and the molecular layer,  
354 confirming Bhlhe22 expression in migrating granule cells (**Figure 6C**).

355 We then investigated the role that Bhlhe22 plays in postnatal granule cell development  
 356 using a well-established *in vitro* system (Lee, Greene, Mason, & Manzini, 2009). Three sets of  
 357 experiments were performed using isolated granule cells from P6.5 cerebella transfected with  
 358 siRNA targeting Bhlhe22 transcripts (**Figure 7A**). First, to determine if Bhlhe22 expression was  
 359 diminished, changes in gene expression were assessed after 3 days *in vitro* (DIV) using reverse  
 360 transcriptase quantitative PCR (RT-qPCR). A 50% reduction of Bhlhe22 expression, on average,  
 361 was found in treated cultures compared to controls (**Figure 7B**).

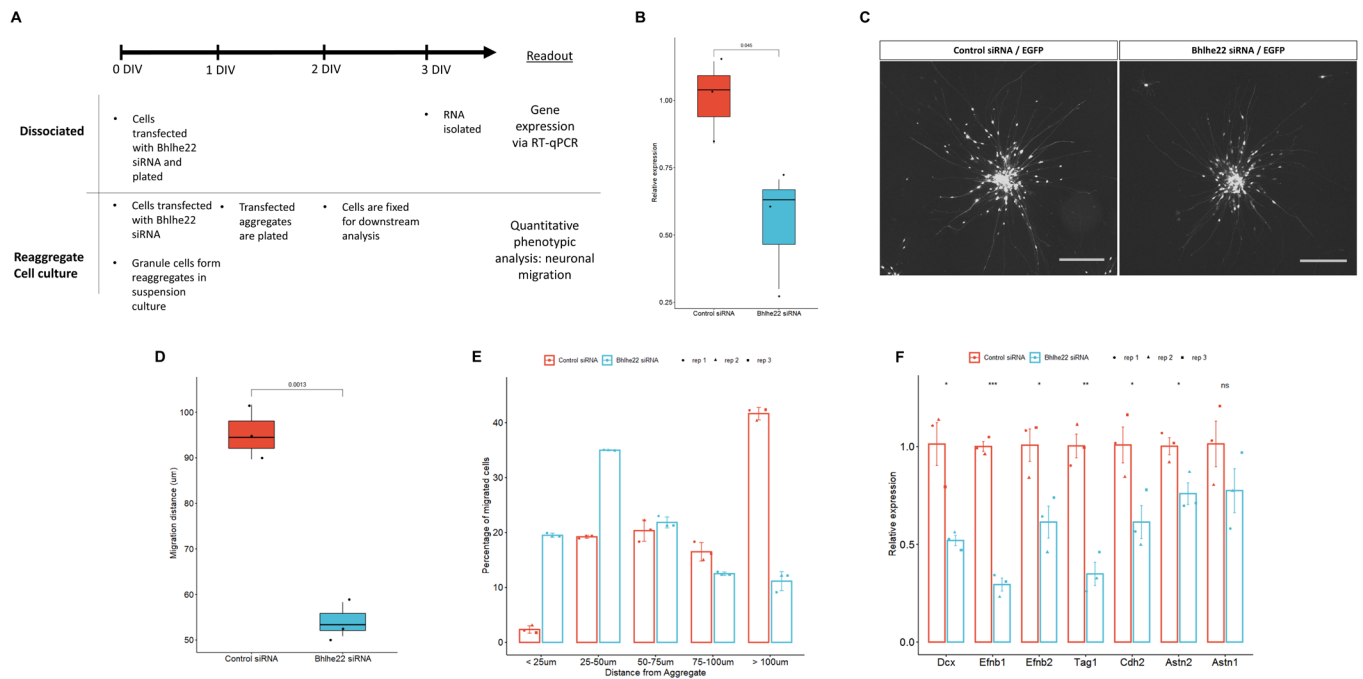

362  
 363 **Figure 7. Knockdown of Bhlhe22 reduces migration of cultured cerebellar granule cells.** **A)** Workflow for  
 364 dissociated and reaggregate postnatal granule cell cultures. **B)** RT-qPCR analysis of Bhlhe22 gene expression in  
 365 dissociated postnatal granule cell cultures after treatment with Bhlhe22 siRNA. Gene expression was normalized  
 366 relative to the expression of the co-transfected EGFP protein to account for transfection variability between cultures.  
 367 Data are presented as mean  $\pm$  SD (n = 3). **C)** Image of cultured cerebellar granule cell reagggregates treated with  
 368 control and Bhlhe22 siRNA. Shown are EGFP positive cells indicating successful transfection. Scalebars = 100µm.  
 369 **D)** Box plot displaying mean distance of granule cell migration from the aggregate. Value above indicates a  
 370 statistical difference between control cultures and those treated with Bhlhe22 siRNA (p-value = 0.0013). **E)** Bar plot  
 371 showing the percentage of cells migrated at different distances from the aggregate for control and Bhlhe22 siRNA  
 372 treated cerebellar granule cell cultures. **F)** RT-qPCR analysis of gene expression of cell adhesion molecules in  
 373 dissociated postnatal granule cell cultures after treatment with Bhlhe22 siRNA. Gene expression was normalized  
 374 relative to the expression of the co-transfected EGFP protein to account for transfection variability between cultures.  
 375 Data are presented as mean  $\pm$  SD (n = 3). Symbols: \*: p  $\leq$  0.05, \*\*: p  $\leq$  0.01, \*\*\*: p  $\leq$  0.001, which indicate  
 376 statistical differences observed between Bhlhe22 siRNA treated samples and controls. All error bars represent the  
 377 standard error of the man  
 378

379 Second, phenotypes of the transfected cells were examined; examining their neuritic  
380 outgrowths from the aggregate, and the migration of granule cells from the aggregates, within the  
381 first 24 hours of plating (Gartner, Collin, & Lalli, 2006). Neuritic outgrowth was unaffected,  
382 however there was a marked reduction in migration (**Figure 7C**). Bhlhe22 siRNA transfected  
383 cells travelled on average 54.2um from the edge of the aggregate, a 50% reduction compared to  
384 control samples (**Figure 7D**). Examining the distribution of migrated cells from the edge of the  
385 aggregate, there was a higher percentage of Bhlhe22 siRNA transfected granule cells migrating  
386 less than 50um, while the majority of the cells in control samples migrated 100um and beyond  
387 (**Figure 7E**).

388 Third, changes in the expression of cell adhesion molecules that are known to be  
389 involved in granule cell development were assessed (Consalez et al., 2021; Wang et al., 2007). A  
390 significant reduction of *Efnb1*, *Efnb2*, *Tag1*, *Cdh2* and *Astn2* was observed in Bhlhe22  
391 knockdown granule cell cultures compared to controls (**Figure 7F**). In addition to these genes,  
392 we also found a significant reduction in Doublecortin (*Dcx*) expression. Taken together, these *in*  
393 *vitro* knockdown experiments reveal a novel function for Bhlhe22, a gene that was identified by  
394 our temporal enhancer-target gene analysis and was predicted to have a critical role in postnatal  
395 granule cell development.

396

### 397 **Active cerebellar enhancers are enriched for common and *de novo* genetic variants** 398 **associated with autism spectrum disorder.**

399 Genome wide association studies (GWAS) have revealed that the majority of variants  
400 associated with neurodevelopmental diseases are found within non-coding regulatory sequences,  
401 particularly enhancers (Visel, Rubin, & Pennacchio, 2009). Given the emerging importance of the  
402 cerebellum in the etiology of autism spectrum disorder (ASD), we tested whether ASD-  
403 associated variants are enriched in cerebellar enhancers. The software tool GREGOR (Genomic  
404 Regulatory Elements and Gwas Overlap algoRithm) was used to evaluate the enrichment of  
405 common genetic variants associated with ASD in cerebellar enhancers (Schmidt et al., 2015). ASD  
406 associated SNPs were retrieved from the GWAS Catalog (Buniello et al., 2019) and a stringent  
407 filter was applied to identify SNPs associated with the ASD (Supplementary Table 2). We  
408 examined 174 ASD-associated SNPs with a maximum p-value of 9E-06 (Buniello et al., 2019).  
409 ASD-associated SNPs were enriched in cerebellar enhancers (p-value = 2.34E-03) and in



410 H3K27ac peaks at E12, P0, and P9 (p-values of 1.29E-03, 1.05E-02 and 1.42E-04, respectively)  
 411 (**Figure 8A**). For the 13 cerebellar enhancers containing ASD-associated SNPs, we identified 12  
 412 predicted target genes (Supplementary Table 3). Among these, three (*PAX6*, *TCF4*, and *ZMIZ1*)  
 413 are ASD risk genes according to the Simons Foundation Autism Research Initiative (SFARI)  
 414 gene database (Banerjee-Basu & Packer, 2010).

415 *De novo* mutations (DNMs) (variants present in the genome of a child but not his or her  
 416 parents) have been found to play a significant role in the etiology of ASD, including those found  
 417 in non-coding regions of the genome (Grove et al., 2019; Yuen et al., 2016). We hypothesized that  
 418 DNMs within cerebellar enhancers would be more prevalent in ASD-affected individuals  
 419 compared with their unaffected siblings. We used whole-genome sequencing data from 2,603  
 420 ASD-affected individuals and 164 unaffected siblings from the MSSNG cohort (C Yuen et al.,  
 421 2017), as well as 2,340 ASD-affected individuals and 1,898 unaffected siblings from the Simons  
 422 Simplex Collection (SSC) (Fischbach & Lord, 2010) to analyze the prevalence of DNMs in ASD-  
 423 affected individuals compared with their unaffected siblings.

424

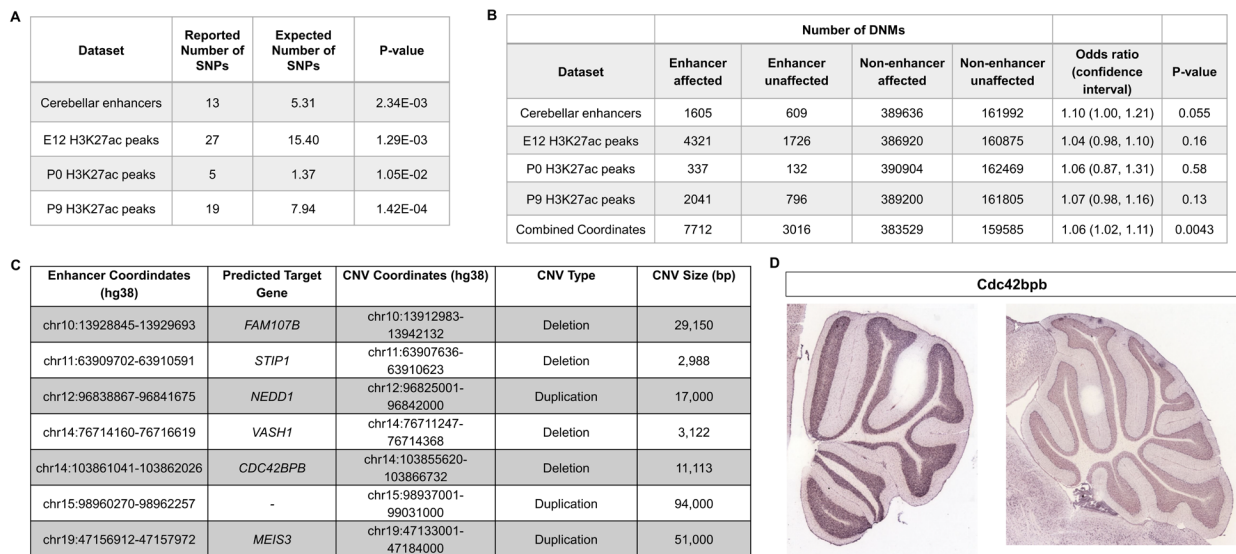

425

426

427 **Figure 8. Cerebellar enhancers are enriched for GWAS SNPs and DNMs associated with ASD.** **A)** Number of  
 428 ASD-associated GWAS variants identified in cerebellar enhancers and H3K27ac peaks called from E12, P0, and P9  
 429 samples. **B)** Enrichment of *de novo* single nucleotide variants and indels in ASD-affected individuals compared with  
 430 their unaffected siblings. Counts are not equal to the sum of the four enhancer types because some enhancers are  
 431 categorized as more than one type. **C)** Gene targets for enhancers overlapped by *de novo* CNVs in the SSC cohort.  
 432 **D)** *In situ* hybridization showing *Cdc42bpb* expression in the lateral (left) and medial (right) adult mouse cerebellum  
 433 (REF mouse brain atlas). Note expression is found in granule cells, particularly those of the lateral cerebellum.

434

435 We found that DNMs (specifically *de novo* single nucleotide variants and indels) in  
436 cerebellar enhancers and H3K27ac peaks from E12, P0 and P9 were enriched in ASD-affected  
437 individuals, with odds ratios ranging from 1.04 to 1.10 (**Figure 8B**). While these differences  
438 were not statistically significant for cerebellar enhancers and peak coordinates individually,  
439 statistical significance was achieved when combined (odds ratio=1.06; p-value=0.0043). We also  
440 identified *de novo* CNVs overlapping cerebellar enhancers. Since the number of such CNVs was  
441 too small to perform statistical enrichment tests, we selected a subset of 7 of these CNVs (4  
442 deletions and 3 duplications) for further characterization to identify candidates for association  
443 with ASD (**Figure 8C**). The most promising candidate was an ~11 kb deletion overlapping an  
444 enhancer predicted to target *CDC42BPB*, which has previously been implicated in  
445 neurodevelopmental phenotypes (Chilton et al., 2020). By visual validation in Integrative  
446 Genomics Viewer (Robinson et al., 2011), we verified that this deletion was truly *de novo*  
447 (Supplementary Figure 4). *CDC42BPB* is expressed in the granule cell layer of the adult mouse  
448 cerebellum (**Figure 8D**) and is expressed in the lateral aspects of the cerebellum but not the  
449 medial cerebellum.

450

## 451 **Discussion**

452 The current model of gene expression regulation during brain development posits that  
453 temporal and spatial transcription is under the intricate control of thousands of non-coding  
454 enhancer sequences (Nord & West, 2020). This model has emerged from the findings of several  
455 studies of enhancer activity in various parts of the developing brain (Nord et al., 2013; Pattabiraman  
456 et al., 2014; Visel et al., 2013). In our study on the cerebellum, we performed an assessment of  
457 enhancer activity through genome-wide profiling of H3K4me1 and H3K27ac deposition at three  
458 time points during embryonic and early postnatal times. These datasets were utilized to define  
459 functional enhancer elements with temporally specific activity during these developmental ages.  
460 In doing so, we establish the first catalog of predicted enhancers active during embryonic  
461 cerebellum development. Through a motif enrichment analysis, neural TF motifs were found to  
462 be enriched in cerebellar enhancers which may drive temporally specific enhancer activation.  
463 This analysis highlighted a novel regulatory role for several understudied TFs in the context of  
464 cerebellar development. These data were then integrated with a transcriptomic time course to  
465 identify predicted target genes to inform our understanding of enhancer regulation in the

466 developing cerebellum. Through unbiased clustering, we identified enhancer-regulated co-  
467 expression gene programs with spatially distinct patterns of expression and unique biological  
468 functions during embryonic and postnatal development. Further analysis of these results led to  
469 the discovery of novel cell-type marker and regulator of cerebellar development and highlights  
470 the importance of enhancer regulation during brain development and the etiology of ASD.

471

## 472 **Cerebellar enhancers regulate gene expression important for distinct stages of neuronal** 473 **development**

474 Identification of enriched TF binding sites and putative target genes indicated that  
475 cerebellar enhancers likely play a regulatory role in various phases of neuronal development. In  
476 agreement with our results, previous examinations of active non-coding regulatory sequences  
477 revealed that neural progenitor cells and mature neurons exhibit distinct signatures of enhancer-  
478 associated histone profiles, DNA methylation, chromatin conformation and enhancer-promoter  
479 interactions (Bonev et al., 2017; de la Torre-Ubieta et al., 2018; Lister et al., 2013; Whyte et al., 2012).  
480 Bonev et al. (2017) examined changes in enhancer-promoter interactions between transgenic cell  
481 lines FACS sorted for embryonic stem cells, neural progenitors and mature neurons and  
482 identified that changes in enhancer-promoter contacts are cell-state specific and correlate with  
483 changes in gene expression (Bonev et al., 2017). When comparing contacts in neuro-progenitors  
484 and mature neurons, a decrease in the interaction strength was observed between active domains  
485 compared to an increased strength in inactive domains, indicating a shift in usage of regulatory  
486 sequences. These changes were also reflected at the level of TF binding, as interactions at Pax6-  
487 bound sites, a TF marking neural progenitors, were stronger in neural progenitors than in  
488 neurons, while NeuroD2-bound sites, a TF marking mature neurons, were stronger in neurons  
489 than NPCs (Bonev et al., 2017). This shift in enhancer usage throughout cortical development is  
490 also reflected in DNA methylation profiles, where fetal enhancers are hypermethylated and  
491 decommissioned in the adult brain, while enhancers regulating adult gene expression were  
492 hypomethylated (Lister et al., 2013). Hypermethylation was accompanied by a decrease in  
493 H3K4me1, H3K27ac and DNase hypersensitivity while the increase was observed after  
494 hypomethylation (Lister et al., 2013). Our study supports the importance of temporally-specific

495 activity during different stages of neuron development *in vivo* and details the processes driven by  
496 enhancer-regulated expression during embryonic and early postnatal brain development.

497 Expression analysis of two genes novel to cerebellar development, Pax3 and Bhlhe22,  
498 supported the notion that enhancer profiles are specific to developmental stage. TF enrichment  
499 analysis identified Pax3 preferentially enriched in Early active enhancers and robust expression  
500 of Pax3 was localized to GABAergic interneuron progenitor cells. Interestingly, through further  
501 examination of cerebellar single-cell RNA-seq data produced by Carter et al. (2018), we found  
502 that Pax3 expression is enriched in GABAergic progenitors and differentiating GABAergic  
503 interneurons (Carter et al., 2018). Analysis of predicted gene targets of Late active enhancers  
504 identified Bhlhe22 as a novel gene expressed in postnatal differentiated granule cells, and *in*  
505 *vitro* knockdown experiments in primary granule cells indicated Bhlhe22 regulates granule cell  
506 migration potentially through regulation of cell adhesion molecule expression. These results are  
507 supported by findings in the developing cortex, where Bhlhe22 has been shown to regulate post-  
508 mitotic acquisition of area identity in layers II-V of the somatosensory and caudal motor cortices  
509 (Joshi et al., 2008). The contrasting expression profiles of Pax3 and Bhlhe22 highlight the wide-  
510 ranging developmental impact of enhancer-mediated gene expression regulation.

511 Our findings from the TF enrichment and gene target analyses generated from  
512 preferentially active postnatal enhancers indicate that many of the enhancers captured are active  
513 in the developing granule cells and Purkinje cells. We attribute this apparent bias to our whole  
514 tissue approach, as granule cells and Purkinje cells are the predominant cells in the cerebellum at  
515 that time, making it more likely to capture signals specific to these cells compared to other less  
516 abundant cell types. Our study therefore reveals that to elucidate enhancers specifically active  
517 within less abundant cell types, a more granular approach may be required through single-cell  
518 examination of chromatin accessibility, such as single cell ATAC-seq. This approach can be  
519 coupled with the abundance of scRNA-seq data that has been collected in the developing  
520 cerebellum. This strategy has seen success in the developing cortex and more recently in the  
521 cerebellum (Preissl et al., 2018; Sarropoulos et al., 2021).

522

523

524 **Co-expressed gene targets of cerebellar enhancers display cell type-specific expression**  
525 **patterns**

526 In addition to being temporally-specific, recent evidence indicates that enhancer activity  
527 is cell type specific in the brain (Blankvoort, Witter, Noonan, Cotney, & Kentros, 2018). This is  
528 highlighted in the identification of cerebellar enhancer target gene clusters for Early and Late  
529 active enhancers with cell specific patterns of expression (Figure 4 and 5). For example, distinct  
530 boundaries can be seen in gene expression from Early Clusters 3 and 4 at E11.5 between cells in  
531 the subpial stream (Cluster 4) and neuroepithelium (Cluster 3) where neural precursors of two  
532 separate lineages, the glutamatergic cerebellar nuclei and GABAergic cerebellar nuclei and  
533 Purkinje cells, are found, respectively. These sharp borders are reminiscent of the small domains  
534 of distinct enhancer activity identified in neural progenitors in the telencephalon, which were  
535 found to fate-map to specific prefrontal cortex subdivisions (Pattabiraman et al., 2014). We see a  
536 similar pattern in the more developed postnatal cerebellum, observing a spatial distinction  
537 between Late Clusters 1/3 and 2/4 delineating expression in granule cells and Purkinje cells,  
538 respectively. This cell type specific enhancer usage is demonstrated in the adult brain.  
539 Blankvoort et al (2018) (Blankvoort et al., 2018) used ChIP-seq analysis of microdissected  
540 subregions of the adult mouse cortex to reveal unique enhancer profiles pertaining to each  
541 region. Additionally, Nott et al (2019) (Nott et al., 2019) identified enhancer-promoter interactome  
542 maps specific to the major cell types in the cortex, which included neurons, microglia,  
543 oligodendrocyte and astrocytes. Enriched GO terms for each cerebellar target gene clusters were  
544 cell-type and temporally specific, highlighting enhancer specificity. Functionally annotating their  
545 respective clusters provides a working hypothesis for hundreds of genes, which can be used as a  
546 jumping point for future in-depth studies in the cerebellum. Collectively, these findings support  
547 the notion that the cell types in the cerebellum have specific enhancer signatures relevant which  
548 are reflected by the expression and functions of their target genes.

549

550 **GWAS SNPs and DNMs associated with ASD are enriched in cerebellar enhancers**

551 Having established and characterized enhancer sequences in the cerebellum, we sought to  
552 elucidate the potential involvement of these regions in the etiology of neurological disorders;  
553 imaging and quantitative data show consistent cerebellar abnormalities, particularly in cases of

554 individuals with autism (Limperopoulos et al., 2014) (Stoodley & Limperopoulos, 2016). Our results  
555 indicate that cerebellar enhancer sequences are significantly enriched for GWAS variants and  
556 DNMs associated with ASD, suggesting an important role for enhancers in contributing to the  
557 condition. PAX6 was among 12 target genes of cerebellar enhancers containing ASD-associated  
558 variants and is classified in the SFARI as a ASD risk gene. The deletion of Pax6 in the murine  
559 cerebellum results in aberrant development of the glutamatergic cells in the cerebellum: the  
560 cerebellar nuclei, unipolar brush cells and granule cells (Yeung et al., 2016). Behavioral analysis  
561 of Pax6 animal models has also indicated a possible link between this gene and autistic-like  
562 behavior (Umeda et al., 2010). Additionally, Pax6 has been linked with WAGR (Wilm's tumor,  
563 Aniridia, Genitourinary malformations, and mental Retardation syndrome) which is co-morbid  
564 for ASD. Our analysis invites future investigation these target genes and how perturbation of  
565 their expression may lead to ASD phenotypes.

566         Of the target genes of the enhancers that overlapped *de novo* CNVs in the SSC cohort,  
567 none have been previously associated with cerebellar development. Interestingly, one of these  
568 target genes, *CDC42BPB*, has recently been associated with neurodevelopmental disorders  
569 including ASD (Chilton et al., 2020). This gene is a serine/threonine protein kinase and codes for  
570 MRCK $\beta$  (myotonic dystrophy-related Cdc42-binding kinase beta), a regulator of cell  
571 cytoskeletal reorganization and cell migration (Pichaud, Walther, & Nunes de Almeida, 2019). Of  
572 note, the CNV associated with this gene deletes the entire enhancer. *CDC42BPB* shows  
573 expression in the granule cell layer of the lateral adult cerebellum, which has been associated  
574 with cognitive functions (Koziol et al., 2014).

575         Together, our data serves as an invaluable resource for future studies, by providing  
576 candidate genes involved in cerebellar development with potentially meaningful impact in the  
577 etiology of ASD and other neurodevelopmental disabilities.

578

## 579 **Materials and Methods**

### 580 **Mouse strains and husbandry**

581 C57BL/6 J mice were originally purchased from JAX laboratory and maintained and bred in a  
582 pathogen-free animal facility with 12/12 hour light/dark cycle and a controlled environment.  
583 Embryonic ages utilized in these experiments were confirmed based upon the appearance of a

584 vaginal plug. The morning that a vaginal plug was detected was designated as E0.5. Pregnant  
585 females were cervically dislocated and embryos were harvested from the uterus. Postnatal ages  
586 were determined based upon the date of birth with the morning of the observation of newborn  
587 pups considered as P0.5. All studies were conducted according to the protocols approved by the  
588 Institutional Animal Care and Use Committee and the Canadian Council on Animal Care at the  
589 University of British Columbia.

590

### 591 **Tissue preparation for chromatin immunoprecipitation**

592 C57BL/6 J mice (male and female) at E12.5, P0.5 and P9.5 (henceforth referred to as E12, P0,  
593 and P9) were decapitated for dissection of cerebella. Cerebella were dissected and collected in  
594 ice cold Dulbecco's PBS (DPBS) without magnesium or calcium and subsequently washed 2x  
595 for 5 minutes. Samples from each litter were pooled and trypsinized in DPBS containing 0.25%  
596 trypsin for 10, 15 and 30 min at room temperature for E12, P0 and P9, respectively. Following 3  
597 washes with fresh DPBS, the tissue was triturated with 3 progressively smaller (1, 0.5, 0.1mm)  
598 bore polished and sterile pipettes in DPBS containing 250U/ml DNase, 0.25% glucose, and  
599 8mg/ml BSA. The triturated cells were diluted 1:4 with cold DPBS and passed through a cell  
600 strainer (40µm mesh) to remove large cellular debris. The cells were collected by mild  
601 centrifugation, washed in fresh DPBS and counted. The cells were split into 100,000 cell  
602 aliquots, pelleted and snap frozen using liquid nitrogen. Cell pellets were stored at -80°C.

603

### 604 **Histone chromatin immunoprecipitation**

605 We performed native chromatin immunoprecipitation (ChIP) using validated antibodies against  
606 H3K4me1 and H3K27ac according to previously established protocols by the International  
607 Human Epigenomics Consortium (IHEC) (Lorzadeh, Lopez Gutierrez, Jackson, Moksa, & Hirst,  
608 2017). Briefly, cells were lysed in mild non-ionic detergents (0.1% Triton X-100 and  
609 Deoxycholate) and protease inhibitor cocktail (Calbiochem) to preserve the integrity of histones  
610 harbouring epitopes of interest during cell lysis. Cells were digested by Micrococcal nuclease  
611 (MNase) at room temperature for 5 minutes and 0.25mM EDTA was used to stop the reaction.  
612 Antibodies to H3K4me1 (Diagenode: Catalogue #C15410037, lot A1657D) and H3K27ac  
613 (Hiroshi Kimura, Cell Biology Unit, Tokyo Institute of Technology) were incubated with anti-  
614 IgA magnetic beads (Dynabeads from Invitrogen) for 2 hours. Digested chromatin was incubated

615 with magnetic beads alone for 1.5 hours. Digested chromatin was separated from the beads and  
616 incubated with antibody-bead complex overnight in immunoprecipitation buffer (20mM Tris-  
617 HCl pH 7.5, 2mM EDTA, 150mM NaCl, 0.1% Triton X-100, 0.1% Deoxycholate). The resulting  
618 immunoprecipitations were washed 2 times by low salt (20mM Tris-HCl pH 8.0, 2mM EDTA,  
619 150mM NaCl, 1% Triton X-100, 0.1% SDS) and then high salt (20mM Tris-HCl pH 8.0, 2mM  
620 EDTA, 500 mM NaCl, 1% Triton X-100, 0.1% SDS) wash buffers. Immunoprecipitations were  
621 eluted in an elution buffer (1% SDS, 100 mM Sodium Bicarbonate) for 1.5 hours at 65°C.  
622 Remaining histones were digested by Protease (Invitrogen) for 30 minutes at 50°C and DNA  
623 fragments were purified using Ampure XP beads (Beckman Coulter). The library preparation  
624 was conducted by Diagenode ChIP-seq/ChIP-qPCR Profiling service (Diagenode Cat#  
625 G02010000) using the MicroPlex Library Preparation Kit v2 (Diagenode Cat. C05010013). 50-  
626 bp single-end sequencing was performed on all libraries by Diagenode (Belgium) on an Illumina  
627 HiSeq 3000 platform. Two independent biological replicates were performed for each antibody  
628 and developmental time point.

629

### 630 **Histone modification ChIP-seq data processing**

631 The sequencing data were uploaded to the Galaxy web platform (usegalaxy.org) for analyses  
632 (Afgan et al., 2016). 50-bp single-end ChIP-seq reads were aligned to the NCBI37/mm9 reference  
633 genome and converted to binary alignment/map (BAM) format by Bowtie2 v.2.3.4 (Langmead,  
634 Trapnell, Pop, & Salzberg, 2009) with default parameters. Duplicate reads were marked using  
635 Picard v.1.52. Peak enrichment was computed using MACS v.2.1.1 (Zhang, Y. et al., 2008) with a  
636 false discovery rate (FDR) cutoff of 0.01 (p-value < 1E-5) using input samples as a control for  
637 each replicate. bigWigs were generated and normalized by the total number of mapped reads  
638 using the BamCompare and profiles were generated from these bigWigs by calculating average  
639 coverage in 50 bp bins using Deeptools v.3.3 (Ramírez et al., 2016) for downstream analysis and  
640 visualization.

641

### 642 **Identification of active cerebellar enhancers**

643 We first determined consensus peaks between replicates for both H3K27ac and H3K4me1 peaks  
644 collected at E12, P0 and P9 using the *intersect* function from Bedtools v.2.28 (Quinlan & Hall,  
645 2010). Robust active cerebellar enhancers were identified by overlapping replicated H3K27ac



646 and H3K4me1 peaks called for E12, P0 and P9 samples. The genomic coordinates of the  
647 H3K27ac peaks that overlapped with H3K4me1 enriched regions at the same age were used for  
648 our list of robust active cerebellar enhancers. We then removed peaks found within promoter  
649 sequences by eliminating any peaks found 500bp upstream or downstream of transcription start  
650 sites (TSSs) in the developing cerebellum as determined previously (Zhang et al., 2018). The  
651 resulting list of robust active cerebellar enhancer sequences at E12, P0, and P9 were used for  
652 downstream analysis.

653 For the comparative analysis with cerebellar postnatal enhancers previously published by Frank  
654 et al. (2015), H3K27ac and DNase-seq peak coordinates were downloaded from Gene  
655 Expression Omnibus (GEO) (GSE60731). The following sequences were downloaded from  
656 public enhancer databases: 1) enhancers downloaded from the VISTA Enhancer Browser  
657 (<https://enhancer.lbl.gov/>) (Visel et al., 2007) with hindbrain activity were filtered using the  
658 ‘Advanced Search’ tool, selecting “hindbrain” under Expression Pattern and retrieving only  
659 mouse sequences with positive signal and 2) mouse cerebellar neonate enhancer coordinates  
660 were downloaded from the Enhancer Atlas 2.0 repository  
661 (<http://www.enhanceratlas.org/downloadv2.php>) (Gao & Qian, 2020). For the comparisons,  
662 sequences were overlapped with our robust cerebellar enhancer peaks and H3K27ac peaks at  
663 E12, P0 and P9 using Bedtools v.2.28(Quinlan & Hall, 2010).

664

### 665 **Differential binding analysis**

666 Aligned read counts (BAM file format) from our H3K27ac ChIP-seq experiments mapped to our  
667 robust active cerebellar enhancers for E12, P0 and P9 samples were used as input to the package  
668 DiffBind v1.4.2 (Stark & Brown, 2011). Read counting at each genomic location was conducted,  
669 which was subsequently normalized by experimental input samples. The result of counting is a  
670 binding affinity matrix containing normalized read counts for every sample at each robust active  
671 cerebellar enhancer. For differential binding affinity analysis, three contrasts were set up in  
672 DiffBind: E12 vs P0, E12 vs P9, and P0 vs P9. Differential binding was determined by DiffBind  
673 using a negative binomial test at an FDR < 0.05 threshold. The FDRs and normalized signal  
674 difference for each contrast were plotted using the EnhancedVolcano package in R (Kevin Blighe,  
675 Sharmila Rana, & Myles Lewis, 2020).

676

## 677 **Temporal classification of cerebellar enhancers**

678 To determine cerebellar enhancers with embryonic-specific activity, H3K27ac signal at E12 was  
679 compared to P0 and P9. Enhancers with significantly higher signal at E12 for either contrast  
680 were considered “Early” active enhancers. A region found to be enriched for both contrasts was  
681 counted as one enhancer. To determine cerebellar enhancers with postnatal-specific activity,  
682 H3K27ac signal at P9 was compared to E12 and P0. Enhancers with significantly higher signal at  
683 P9 for either contrast were considered “Late” active enhancers. A region found to be enriched for  
684 both contrasts was counted as one enhancer. To determine cerebellar enhancers with activity  
685 specific to birth, H3K27ac signal at P0 was compared to P9 and E12. Enhancers with  
686 significantly higher signal at P0 in both contrasts would identify enhancers that peaked in  
687 activity at P0. We did not identify any enhancers that peaked in activity at P0 and conducted the  
688 remaining analysis for only Early and Late enhancers.

689

## 690 **Transcription factor motif enrichment analysis**

691 Transcription factor motif enrichment was calculated using the software HOMER using the  
692 script FindMotifsGenome.pl with default parameters (Heinz et al., 2010). Analyses for Early and  
693 Late active enhancers were conducted separately. Motif enrichment was statistically analyzed  
694 using a cumulative binomial distribution. Enriched motifs were aligned with known transcription  
695 factor binding sites to determine the best matches. Top known motif matches were filtered based  
696 on expression within the developing cerebellum at E12 for “Early” active enhancers and P9 for  
697 “Late” active enhancers.

698

## 699 **Cerebellar enhancer target gene prediction and co-expression analysis**

700 To identify possible gene targets of our robust cerebellar enhancers, the correlation between  
701 H3K27ac signal and mRNA expression of genes located in *cis* at E12, P0 and P9 was calculated.  
702 For a given enhancer, a gene located in *cis* was considered a possible target if it was positively  
703 correlated with H3K27ac signal throughout time. These genes were then filtered based on  
704 location using conserved topologically associating domains (TADs), which are areas of the  
705 genome that preferentially interact (Dixon et al., 2012). These TADs are conserved between  
706 different cell types and even across species and were established using Hi-C data generated,  
707 previously. Gene target candidates for a given enhancer were curated for those located within the

708 same TAD. Predicted gene targets were then ranked based on their Pearson correlation  
709 coefficient value. For the predicted gene targets of Early and Late active enhancers, we  
710 conducted *k-means* clustering of predicted gene targets separately. Input for this analysis was  
711 gene expression captured from cerebella at 12 embryonic and postnatal time points (Zhang et al.,  
712 2018). Briefly, gene expression was quantified using Cap Analysis of Gene Expression followed  
713 by sequencing (CAGE-seq) for mouse cerebellar samples dissected every 24 hours from E11-P0  
714 and then every 72 hours until P9 (12 in vivo time points in total). The number of clusters for the  
715 *k-means* clustering was determined using the Elbow analysis for each classified group of  
716 enhancers: Early (n=4) and Late (n=4).

717

### 718 **Tissue preparation for histology**

719 Embryos harvested between E11.5 to E15.5 were fixed by immersion in 4% paraformaldehyde in  
720 0.1M phosphate buffer (PB, pH 7.4) for 1 hour at 4°C. Postnatal mice between P0.5 to P6.5 were  
721 perfused through the heart with a saline solution followed by 4% paraformaldehyde/0.1M PBS.  
722 The brain tissues were isolated and further fixed in 4% paraformaldehyde in 0.1M PB for 1 hour  
723 at room temperature. Fixed tissues were rinsed with PBS, followed by cryoprotection with 30%  
724 sucrose/PBS overnight at 4°C before embedding in the Optimal Cutting Temperature compound  
725 (Tissue-Tek). Tissues were sectioned at 12um for immunofluorescence experiments and  
726 cryosections were mounted on Superfrost slides (Thermo Fisher Scientific), air dried at room  
727 temperature, and stored at -80°C until used. Sagittal sections were cut from one side of the  
728 cerebellum to the other (left to right, or vice versa). In all cases, observations were based on a  
729 minimum of 3 embryos per genotype per experiment.

730

### 731 **Cerebellar immunostaining**

732 Tissue sections were first rehydrated in PBS (3 x 5 minute washes) followed by a phosphate  
733 buffered saline with Triton X-100 (PBS-T) rinse. Sections were then incubated at room  
734 temperature for 1 hour with blocking solution (0.3% BSA, 10% normal goat serum, 0.02%  
735 sodium azide in PBS-T). Following the blocking step, the slides were incubated with primary  
736 antibody in incubation buffer (0.3% BSA, 5% normal goat serum, 0.02% sodium azide in PBS-  
737 T) at room temperature overnight in a humid chamber. Following the overnight incubation, the  
738 slides were rinsed in 3 x 10 minute PBS-T washes. The sections were then incubated with the

739 appropriate secondary antibody at room temperature for 1 hour, followed by three 0.1M PB  
740 washes and one 0.01M PB wash. Coverslips were applied to the slides using FluorSave mounting  
741 medium (345789, Calbiochem). The primary antibodies used were: rabbit anti-Bhlhe22 (1:1000,  
742 a gift from Dr. Michael Greenburg, Harvard University), mouse anti-Neurod1 (1:500, Abcam,  
743 ab60704), mouse anti-Pax3 (1:500, R&D systems, MAB2457), rabbit anti-Pax2 (1:200,  
744 Invitrogen, 71-6000), mouse anti-NeuN (1:100, Millipore, MAB377), rabbit anti-Calbindin  
745 (1:1000, Millipore, AB1778), rabbit anti-Foxp2 (1:2000, Novus Biologicals NB100-55411),  
746 chicken anti-Doublecortin: (1:100, Abcam ab153668). For immunofluorescence, secondary  
747 antibodies (Invitrogen) labeled with fluorochrome were used to recognize the primary antibodies.

748

### 749 **Granule cell culture**

750 Granule cells were isolated and cultured as previously described (Lee et al., 2009). Briefly,  
751 cerebella from litters of P6 mice were pooled and digested at 37 °C for 20 minutes in 10U ml<sup>-1</sup>  
752 papain (Worthington), and 250U ml<sup>-1</sup> DNase in EBSS using the Papain Dissociation Kit  
753 (Worthington, Cat #:LK003150). The tissue was mechanically triturated and suspended cells  
754 were isolated and resuspended in EBSS with albumin-ovomuroid inhibitor solution. Cell debris  
755 was removed using a discontinuous density gradient and cells were resuspended in HBSS,  
756 glucose and DNase. The cell suspension was then passed through a 40um cell strainer (Falcon  
757 2340), layered on a step gradient of 35% and 65% Percoll (Sigma), and centrifuged at 2,500rpm  
758 for 12 minutes at 25°C. Granule cells were harvested from the 35/65% interface and washed in  
759 HBSS-glucose. Granule cells were then resuspended in Neurobasal medium and 10% FBS and  
760 pre-plated on lightly coated poly-D-lysine-coated dishes for 20 minutes. This step allows any  
761 heavier cells to drop and adhere to the coated surface while the granule cells are retained in the  
762 media. Granule cells in the media were then collected, washed and counted using a  
763 Hemocytometer. The cells were then plated on 25mm or 12mm poly-D-lysine (Sigma), laminin  
764 coated coverglasses placed in 6-well plates with Neurobasal medium containing B-27 serum-free  
765 supplement, 2mm l-glutamine, 100U/ml penicillin, and 100µg/ml streptomycin (pen-strep)  
766 (Invitrogen, Grand Island, NY) and 0.45% d-glucose (Gibco). Granule cells were incubated at  
767 37°C at 5% CO<sub>2</sub> were incubated for 3 days in vitro (DIV).  
768 For aggregate cultures, aggregates were allowed to form by incubating purified granule cells for  
769 20 hours on uncoated tissue culture dishes in DMEM containing 10% FBS, 0.45% D-glucose,

770 Pen-strep, 2mM L-glutamine at 4E6 cells/ml. Aggregates were then washed and cultured in  
771 Neurobasal/B27 medium on poly-d-lysine/laminin-treated chamber slides at 37°C/5% CO<sub>2</sub>.  
772 Neuronal processes extend from aggregates and most form neurite bundles. After several hours,  
773 small bipolar granule cells migrate unidirectionally away from the cell clusters along these  
774 neurites and neurite bundles by extension of processes, followed by translocation of cell bodies  
775 outside of the aggregate cell cluster margin. For immunofluorescence experiments, cells were  
776 fixed in 4% paraformaldehyde for 10 minutes and washed with calcium and magnesium-free  
777 PBS.

778

### 779 **RNA interference**

780 For the knockdown of Bhlhe22, we purchased ON-TARGETplus SMARTPool Mouse Bhlhe22  
781 siRNA from Horizon Discovery (Cat ID: L-063262-01). Control samples were transfected with  
782 ON-TARGETplus Non-targeting Control Pool (Cat ID: D-001810-10). siRNA molecules were  
783 electroporated into isolated postnatal cerebellar granule cells using the Nucleofector 2b Device  
784 (Lonza, AAB-1001) as previously described (Gartner et al., 2006). Briefly, after cells were  
785 isolated (described above), 6-7E6 cells were resuspended in nucleofection solution and mixed  
786 with 3µg of pCAG-EGFP plasmid (Addgene, 89684) and 600nM of siRNA. Cuvettes were  
787 loaded with cellular solution and nucleofected using program O-03. After electroporation, cells  
788 were allowed to recover in DMEM media in a humidified 37°C/5% CO<sub>2</sub> incubator for 90  
789 minutes. Cells were washed and resuspended in either culture media for plating (dissociated  
790 cultures) or DMEM media for overnight incubation (aggregate cultures).

791

### 792 **RNA isolation and reverse transcription followed by quantitative PCR (RT-qPCR)**

793 RNA was collected from cultured granule cells using the Monarch® Total RNA Miniprep Kit  
794 (NEB). Then cDNA was reverse transcribed using SuperScript™ IV First-Strand Synthesis  
795 System (Invitrogen) using random hexamers. Quantitative PCR was conducted using the Applied  
796 Biosystems Fast SYBR Green Master Mix reagent and Applied Biosystems 7500 Real-time PCR  
797 system. PCR conditions were as follows: 95 °C for 20 seconds, 40 cycles of 95 °C for 3 seconds,  
798 and 60 °C for 30 seconds followed by 95 °C for 15 seconds, 60 °C for 1 minute, 95 °C for  
799 15 seconds and 60 °C for 15 seconds. Three biological replicates were analyzed for each target  
800 gene. Amplification of eGFP was used as a reference gene to normalize the relative amounts of

801 successfully transfected cells between treated and control experiments. Gene specific primers are  
802 listed in Supplementary Table 4. Expression profiles for each gene were calculated using the  
803 average relative quantity of the sample using the deltaCT method (Livak & Schmittgen, 2001). For  
804 comparisons between siRNA treated and control samples, means were compared using a two-  
805 tailed t-test. Results were expressed as the average  $\pm$  SE, and p-values  $<0.05$  were considered  
806 significant.

807

### 808 **Image analysis and microscopy**

809 Analysis and photomicroscopy were performed with a Zeiss Axiovert 200M microscope with the  
810 AxioCam/AxioVision hardware-software components (Carl Zeiss) and downstream image  
811 analysis was conducted using the AxioVision software v.4.9.1 (Carl Zeiss). For cerebellar  
812 granule cell aggregate cultures, aggregate size determined using the tracing tool and all  
813 aggregates analyzed were within 1000 squared microns of each other. Transfected cells were  
814 identified by examining eGFP expression and for each biological replicate/experimental  
815 treatment, 20 aggregates were examined. Granule cell migration was measured by calculating the  
816 distance of migrated cells from the edge of the aggregate on captured images. Mean migration  
817 distance was calculated for each aggregate, and the average of all 20 aggregates was used for  
818 statistical analysis. The distribution of migrated cells from the aggregate was calculated for the  
819 following ranges:  $<25\mu\text{m}$ ,  $25\text{-}50\mu\text{m}$ ,  $50\text{-}75\mu\text{m}$ ,  $75\text{-}100\mu\text{m}$ ,  $>100\mu\text{m}$ . For each range, the average  
820 percentage was calculated for 20 aggregates per replicate. For comparisons between siRNA  
821 treated and control samples, means were compared using a two-tailed t-test. Results were  
822 expressed as the average  $\pm$  SE, and p-values  $<0.05$  were considered significant.

823

### 824 **Plots and statistical methods**

825 All plots and correlation analysis were generated in R version 3.2.3 and figures were produced  
826 using the package ggplot2. Bedtools v.2.28 (Quinlan & Hall, 2010) was used for comparing and  
827 overlapping the genomic coordinates of peaks and existing genomic features described in the  
828 manuscript. Boxplots represent the median (centre line), first and third quartiles (top and bottom  
829 of box, respectively) and confidence intervals (95%; black lines). Genome browser screenshots  
830 were taken from the IGV genome browser (Robinson et al., 2011). Bar plots results were  
831 expressed as the average and the corresponding error bars represent standard error.

832

### 833 **GWAS SNP enrichment analysis**

834 Single nucleotide polymorphisms (SNPs) were retrieved from the GWAS Catalog (Buniello et al.,  
835 2019) downloaded on March 8th, 2020. The SNPs were then filtered by their associated traits.  
836 Traits containing the word “autism” were selected and from this list any traits containing the  
837 word “or” were excluded. This resulted in a final list of 8 traits (Supplementary Table 2) and the  
838 associated SNPs were used as input for our analysis. The software Genomic Regulatory  
839 Elements and Gwas Overlap algoRithm (GREGOR) v.1.4.0 (Schmidt et al., 2015), a tool to test for  
840 enrichment of an input list of trait-associated index SNPs in experimentally annotated regulatory  
841 domains, was used to identify enrichment of trait-specific disease variants within enhancers. An  
842 underlying hypothesis of GREGOR is that both trait-associated SNPs and variants in strong  
843 linkage disequilibrium (LD) may be deemed as causal. For this, we used the European  
844 population reference file (EUR; LD window size = 1 Mb; LD  $r^2 \geq 0.7$ ) from 1000G data (Release  
845 date: May 21, 2011). The probability of an overlap of either a SNP or at least one of its LD  
846 proxies with our enhancers relative to a set of matched control variants was used to evaluate  
847 significance of overlap. The enrichment p-value is the probability that the overlap of control  
848 variants with our enhancers is greater than or equal to the overlap of the GWAS variants with our  
849 enhancers.

850

### 851 ***De novo* mutation analysis**

852 *De novo* mutations were detected using whole-genome sequencing data from the MSSNG (Yuen  
853 et al., 2016) and Simons Simplex Collection (SSC) (Isoda et al., 2017) cohorts using a pipeline  
854 involving DeNovoGear (Ramu et al., 2013) as previously described (C Yuen et al., 2017). To  
855 maximize data homogeneity, we included only individuals sequenced on the Illumina HiSeq X  
856 platform. Individuals having a total DNM count more than three standard deviations above the  
857 mean of the cohort were excluded. The NCBI LiftOver tool was used to convert the coordinates  
858 of cerebellar enhancers from mm9 to hg19 to hg38, and BEDTools (Quinlan & Hall, 2010) was  
859 used to identify DNMs overlapping these coordinates. Contingency tables (2x2) were generated  
860 containing counts of the number of DNMs in ASD-affected individuals and unaffected siblings  
861 either overlapping or not overlapping each dataset (cerebellar enhancer or H3K27ac peak  
862 coordinates). Fisher’s exact test was used to determine statistical significance. Copy number

863 variants (CNVs)  $\geq$  1000 bp were detected from the MSSNG and SSC WGS data using a  
864 pipeline involving the algorithms ERDS (Zhu et al., 2012) and CNVnator (Abyzov, Urban, Snyder,  
865 & Gerstein, 2011) as previously described (Trost et al., 2018). A CNV was deemed to be *de novo* if  
866 it was detected by both ERDS and CNVnator in the child but by neither algorithm in both  
867 parents. We then used BEDtools (Quinlan & Hall, 2010) to identify *de novo* CNVs overlapping  
868 our cerebellar enhancers.

### 869 **Competing Interest Statement**

870 Authors have no competing interests.

871

### 872 **Author Contributions**

873 M.R. conducted experiments and was responsible for all major areas of concept formation, data  
874 collection, analysis and manuscript composition. Y.B. processed and analyzed ChIP-seq data and  
875 conducted the human variant enrichment analysis as well as contributed to manuscript writing.  
876 J.Y. was involved in all mouse breeding and sample collection. J.W. and E.Y. were involved in  
877 the initial profiling of Pax3 and conducting immunofluorescent experiments. B.T. and S.W.S.  
878 conducted all genome-wide sequencing and analysis for the enrichment of autism spectrum  
879 disorder variants. D.G. was the supervisory author and was involved in all areas of concept  
880 formation and manuscript edits. All authors contributed to the final drafting of the manuscript.

881

### 882 **References**

- 883 Abyzov, A., Urban, A. E., Snyder, M., & Gerstein, M. (2011). CNVnator: An approach to  
884 discover, genotype, and characterize typical and atypical CNVs from family and population  
885 genome sequencing. *Genome Research*, 21(6), 974-984. doi:10.1101/gr.114876.110
- 886 Afgan, E., Baker, D., van den Beek, M., Blankenberg, D., Bouvier, D., Čech, M., . . . Goecks, J.  
887 (2016). The galaxy platform for accessible, reproducible and collaborative biomedical  
888 analyses: 2016 update. *Nucleic Acids Research*, 44(W1), W3-W10. doi:10.1093/nar/gkw343
- 889 Aruga, J., & Millen, K. J. (2018). ZIC1 function in normal cerebellar development and human  
890 developmental pathology. *Advances in Experimental Medicine and Biology*, 1046, 249-268.  
891 doi:10.1007/978-981-10-7311-3\_13
- 892 Banerjee-Basu, S., & Packer, A. (2010). SFARI gene: An evolving database for the autism  
893 research community. *Disease Models & Mechanisms*, 3(3-4), 133-135.  
894 doi:10.1242/dmm.005439
- 895 Barešić, A., Nash, A. J., Dahoun, T., Howes, O., & Lenhard, B. (2020). Understanding the  
896 genetics of neuropsychiatric disorders: The potential role of genomic regulatory blocks.  
897 *Molecular Psychiatry*, 25(1), 6-18. doi:10.1038/s41380-019-0518-x



- 898 Ben-Arie, N., Bellen, H. J., Armstrong, D. L., McCall, A. E., Gordadze, P. R., Guo, Q., . . .  
899 Zoghbi, H. Y. (1997). Math1 is essential for genesis of cerebellar granule neurons. *Nature*,  
900 390(6656), 169-172. doi:10.1038/36579
- 901 Blankvoort, S., Witter, M. P., Noonan, J., Cotney, J., & Kentros, C. (2018). Marked diversity of  
902 unique cortical enhancers enables neuron-specific tools by enhancer-driven gene expression.  
903 *Current Biology: CB*, 28(13), 2103-2114.e5. doi:10.1016/j.cub.2018.05.015
- 904 Bonev, B., Mendelson Cohen, N., Szabo, Q., Fritsch, L., Papadopoulos, G. L., Lubling, Y., . . .  
905 Cavalli, G. (2017). Multiscale 3D genome rewiring during mouse neural development. *Cell*,  
906 171(3), 557-572.e24. doi:10.1016/j.cell.2017.09.043
- 907 Buniello, A., MacArthur, J. A. L., Cerezo, M., Harris, L. W., Hayhurst, J., Malangone, C., . . .  
908 Parkinson, H. (2019). The NHGRI-EBI GWAS catalog of published genome-wide  
909 association studies, targeted arrays and summary statistics 2019. *Nucleic Acids Research*,  
910 47(D1), D1005-D1012. doi:10.1093/nar/gky1120 [doi]
- 911 C Yuen, R. K., Merico, D., Bookman, M., L Howe, J., Thiruvahindrapuram, B., Patel, R. V., . . .  
912 Scherer, S. W. (2017). Whole genome sequencing resource identifies 18 new candidate  
913 genes for autism spectrum disorder. *Nature Neuroscience*, 20(4), 602-611.  
914 doi:10.1038/nn.4524
- 915 Calo, E., & Wysocka, J. (2013). Modification of enhancer chromatin: What, how, and why?  
916 *Molecular Cell*, 49(5), 825-837. doi:10.1016/j.molcel.2013.01.038
- 917 Carter, R. A., Bihannic, L., Rosencrance, C., Hadley, J. L., Tong, Y., Phoenix, T. N., . . . Gawad,  
918 C. (2018). A single-cell transcriptional atlas of the developing murine cerebellum. *Current*  
919 *Biology: CB*, 28(18), 2910-2920.e2. doi:10.1016/j.cub.2018.07.062
- 920 Carullo, N. V. N., & Day, J. J. (2019). Genomic enhancers in brain health and disease. *Genes*,  
921 10(1) doi:10.3390/genes10010043
- 922 Chilton, I., Okur, V., Vitiello, G., Selicorni, A., Mariani, M., Goldenberg, A., . . . Chung, W. K.  
923 (2020). De novo heterozygous missense and loss-of-function variants in CDC42BPB are  
924 associated with a neurodevelopmental phenotype. *American Journal of Medical Genetics.*  
925 *Part A*, 182(5), 962-973. doi:10.1002/ajmg.a.61505
- 926 Consalez, G. G., Goldowitz, D., Casoni, F., & Hawkes, R. (2021). Origins, development, and  
927 compartmentation of the granule cells of the cerebellum. *Frontiers in Neural Circuits*, 14  
928 doi:10.3389/fncir.2020.611841
- 929 Creighton, M. P., Cheng, A. W., Welstead, G. G., Kooistra, T., Carey, B. W., Steine, E. J., . . .  
930 Jaenisch, R. (2010). Histone H3K27ac separates active from poised enhancers and predicts  
931 developmental state. *Proceedings of the National Academy of Sciences of the United States*  
932 *of America*, 107(50), 21931-21936. doi:10.1073/pnas.1016071107

- 933 de la Torre-Ubieta, L., Stein, J. L., Won, H., Opland, C. K., Liang, D., Lu, D., & Geschwind, D.  
934 H. (2018). The dynamic landscape of open chromatin during human cortical neurogenesis.  
935 *Cell*, 172(1-2), 289-304.e18. doi:10.1016/j.cell.2017.12.014
- 936 Dixon, J. R., Selvaraj, S., Yue, F., Kim, A., Li, Y., Shen, Y., . . . Ren, B. (2012). Topological  
937 domains in mammalian genomes identified by analysis of chromatin interactions. *Nature*,  
938 485(7398), 376-380. doi:10.1038/nature11082
- 939 Ebner, B. A., Ingram, M. A., Barnes, J. A., Duvick, L. A., Frisch, J. L., Clark, H. B., . . . Orr, H.  
940 T. (2013). Purkinje cell ataxin-1 modulates climbing fiber synaptic input in developing and  
941 adult mouse cerebellum. *The Journal of Neuroscience: The Official Journal of the Society*  
942 *for Neuroscience*, 33(13), 5806-5820. doi:10.1523/JNEUROSCI.6311-11.2013
- 943 Elsen, G. E., Bedogni, F., Hodge, R. D., Bammler, T. K., MacDonald, J. W., Lindtner, S., . . .  
944 Hevner, R. F. (2018). The epigenetic factor landscape of developing neocortex is regulated  
945 by transcription factors Pax6→ Tbr2→ Tbr1. *Frontiers in Neuroscience*, 12, 571.  
946 doi:10.3389/fnins.2018.00571
- 947 Fischbach, G. D., & Lord, C. (2010). The simons simplex collection: A resource for  
948 identification of autism genetic risk factors. *Neuron*, 68(2), 192-195.  
949 doi:10.1016/j.neuron.2010.10.006
- 950 Frank, C. L., Liu, F., Wijayatunge, R., Song, L., Biegler, M. T., Yang, M. G., . . . West, A. E.  
951 (2015). Regulation of chromatin accessibility and zic binding at enhancers in the developing  
952 cerebellum. *Nature Neuroscience*, 18(5), 647-656. doi:10.1038/nn.3995
- 953 Frantz, G. D., Bohner, A. P., Akers, R. M., & McConnell, S. K. (1994). Regulation of the POU  
954 domain gene SCIP during cerebral cortical development. *The Journal of Neuroscience: The*  
955 *Official Journal of the Society for Neuroscience*, 14(2), 472-485.
- 956 Fujita, E., Tanabe, Y., Shiota, A., Ueda, M., Suwa, K., Momoi, M. Y., & Momoi, T. (2008).  
957 Ultrasonic vocalization impairment of Foxp2 (R552H) knockin mice related to speech-  
958 language disorder and abnormality of purkinje cells. *Proceedings of the National Academy*  
959 *of Sciences of the United States of America*, 105(8), 3117-3122.  
960 doi:10.1073/pnas.0712298105
- 961 Gao, T., & Qian, J. (2020). EnhancerAtlas 2.0: An updated resource with enhancer annotation in  
962 586 tissue/cell types across nine species. *Nucleic Acids Research*, 48(D1), D58-D64.  
963 doi:10.1093/nar/gkz980 [doi]
- 964 Gartner, A., Collin, L., & Lalli, G. (2006). Nucleofection of primary neurons. *Methods in*  
965 *Enzymology*, 406, 374-388. doi:S0076-6879(06)06027-7 [pii]
- 966 Goldowitz, D., & Hamre, K. (1998). The cells and molecules that make a cerebellum. *Trends in*  
967 *Neurosciences*, 21(9), 375-382.

- 968 Grove, J., Ripke, S., Als, T. D., Mattheisen, M., Walters, R. K., Won, H., . . . Børglum, A. D.  
969 (2019). Identification of common genetic risk variants for autism spectrum disorder. *Nature*  
970 *Genetics*, *51*(3), 431-444. doi:10.1038/s41588-019-0344-8
- 971 Heinz, S., Benner, C., Spann, N., Bertolino, E., Lin, Y. C., Laslo, P., . . . Glass, C. K. (2010).  
972 Simple combinations of lineage-determining transcription factors prime cis-regulatory  
973 elements required for macrophage and B cell identities. *Molecular Cell*, *38*(4), 576-589.  
974 doi:10.1016/j.molcel.2010.05.004 [doi]
- 975 Heinz, S., Romanoski, C. E., Benner, C., & Glass, C. K. (2015). The selection and function of  
976 cell type-specific enhancers. *Nature Reviews. Molecular Cell Biology*, *16*(3), 144-154.  
977 doi:10.1038/nrm3949
- 978 Hoshino, M., Nakamura, S., Mori, K., Kawauchi, T., Terao, M., Nishimura, Y. V., . . .  
979 Nabeshima, Y. (2005). Ptf1a, a bHLH transcriptional gene, defines GABAergic neuronal  
980 fates in cerebellum. *Neuron*, *47*(2), 201-213. doi:10.1016/j.neuron.2005.06.007
- 981 Isoda, T., Moore, A. J., He, Z., Chandra, V., Aida, M., Denholtz, M., . . . Murre, C. (2017). Non-  
982 coding transcription instructs chromatin folding and compartmentalization to dictate  
983 enhancer-promoter communication and T cell fate. *Cell*, *171*(1), 103-119.e18.  
984 doi:10.1016/j.cell.2017.09.001
- 985 Joshi, P. S., Molyneaux, B. J., Feng, L., Xie, X., Macklis, J. D., & Gan, L. (2008). Bhlhb5  
986 regulates the postmitotic acquisition of area identities in layers II-V of the developing  
987 neocortex. *Neuron*, *60*(2), 258-272. doi:10.1016/j.neuron.2008.08.006
- 988 Kevin Blighe, Sharmila Rana, & Myles Lewis. (2020). EnhancedVolcano: Publication-ready  
989 volcano plots with enhanced colouring and labeling [computer software]
- 990 Kim, E. J., Battiste, J., Nakagawa, Y., & Johnson, J. E. (2008). Ascl1 (Mash1) lineage cells  
991 contribute to discrete cell populations in CNS architecture. *Molecular and Cellular*  
992 *Neurosciences*, *38*(4), 595-606. doi:10.1016/j.mcn.2008.05.008 [doi]
- 993 Klisch, T. J., Xi, Y., Flora, A., Wang, L., Li, W., & Zoghbi, H. Y. (2011). In vivo Atoh1  
994 targetome reveals how a proneural transcription factor regulates cerebellar development.  
995 *Proceedings of the National Academy of Sciences*, *108*(8), 3288-3293.
- 996 Koziol, L. F., Budding, D., Andreasen, N., D'Arrigo, S., Bulgheroni, S., Imamizu, H., . . .  
997 Yamazaki, T. (2014). Consensus paper: The cerebellum's role in movement and cognition.  
998 *Cerebellum (London, England)*, *13*(1), 151-177. doi:10.1007/s12311-013-0511-x
- 999 Langmead, B., Trapnell, C., Pop, M., & Salzberg, S. L. (2009). Ultrafast and memory-efficient  
1000 alignment of short DNA sequences to the human genome. *Genome Biology*, *10*(3), R25.  
1001 doi:10.1186/gb-2009-10-3-r25

- 1002 Lee, H. Y., Greene, L. A., Mason, C. A., & Manzini, M. C. (2009). Isolation and culture of post-  
1003 natal mouse cerebellar granule neuron progenitor cells and neurons. *Journal of Visualized*  
1004 *Experiments : JoVE*, (23). pii: 990. doi(23), 10.3791/990. doi:10.3791/990 [doi]
- 1005 Leto, K., Bartolini, A., Yanagawa, Y., Obata, K., Magrassi, L., Schilling, K., & Rossi, F. (2009).  
1006 Laminar fate and phenotype specification of cerebellar GABAergic interneurons. *The*  
1007 *Journal of Neuroscience: The Official Journal of the Society for Neuroscience*, 29(21),  
1008 7079-7091. doi:10.1523/JNEUROSCI.0957-09.2009
- 1009 Leto, K., Carletti, B., Williams, I. M., Magrassi, L., & Rossi, F. (2006). Different types of  
1010 cerebellar GABAergic interneurons originate from a common pool of multipotent progenitor  
1011 cells. *The Journal of Neuroscience: The Official Journal of the Society for Neuroscience*,  
1012 26(45), 11682-11694. doi:10.1523/JNEUROSCI.3656-06.2006
- 1013 Limperopoulos, C., Chilingaryan, G., Sullivan, N., Guizard, N., Robertson, R. L., & du Plessis,  
1014 A. J. (2014). Injury to the premature cerebellum: Outcome is related to remote cortical  
1015 development. *Cerebral Cortex (New York, N.Y.: 1991)*, 24(3), 728-736.  
1016 doi:10.1093/cercor/bhs354
- 1017 Lindtner, S., Catta-Preta, R., Tian, H., Su-Feher, L., Price, J. D., Dickel, D. E., . . . Rubenstein, J.  
1018 L. R. (2019). Genomic resolution of DLX-orchestrated transcriptional circuits driving  
1019 development of forebrain GABAergic neurons. *Cell Reports*, 28(8), 2048-2063.e8.  
1020 doi:10.1016/j.celrep.2019.07.022
- 1021 Lister, R., Mukamel, E. A., Nery, J. R., Urich, M., Puddifoot, C. A., Johnson, N. D., . . . Ecker, J.  
1022 R. (2013). Global epigenomic reconfiguration during mammalian brain development.  
1023 *Science (New York, N.Y.)*, 341(6146), 1237905. doi:10.1126/science.1237905
- 1024 Livak, K. J., & Schmittgen, T. D. (2001). Analysis of relative gene expression data using real-  
1025 time quantitative PCR and the 2(-delta delta C(T)) method. *Methods (San Diego, Calif.)*,  
1026 25(4), 402-408. doi:10.1006/meth.2001.1262 [doi]
- 1027 Lorzadeh, A., Lopez Gutierrez, R., Jackson, L., Moksa, M., & Hirst, M. (2017). Generation of  
1028 native chromatin immunoprecipitation sequencing libraries for nucleosome density analysis.  
1029 *Journal of Visualized Experiments : JoVE*, (130). doi(130), 10.3791/56085.  
1030 doi:10.3791/56085 [doi]
- 1031 Maricich, S. M., & Herrup, K. (1999). Pax-2 expression defines a subset of GABAergic  
1032 interneurons and their precursors in the developing murine cerebellum. *Journal of*  
1033 *Neurobiology*, 41(2), 281-294. doi:10.1002/(sici)1097-4695(19991105)41:23.0.co;2-5
- 1034 Miyata, T., Maeda, T., & Lee, J. E. (1999). NeuroD is required for differentiation of the granule  
1035 cells in the cerebellum and hippocampus. *Genes & Development*, 13(13), 1647-1652.  
1036 doi:10.1101/gad.13.13.1647

- 1037 Nord, A. S., Blow, M. J., Attanasio, C., Akiyama, J. A., Holt, A., Hosseini, R., . . . Visel, A.  
1038 (2013). Rapid and pervasive changes in genome-wide enhancer usage during mammalian  
1039 development. *Cell*, *155*(7), 1521-1531. doi:10.1016/j.cell.2013.11.033
- 1040 Nord, A. S., & West, A. E. (2020). Neurobiological functions of transcriptional enhancers.  
1041 *Nature Neuroscience*, *23*(1), 5-14. doi:10.1038/s41593-019-0538-5
- 1042 Nott, A., Holtman, I. R., Coufal, N. G., Schlachetzki, J. C. M., Yu, M., Hu, R., . . . Glass, C. K.  
1043 (2019). Brain cell type-specific enhancer-promoter interactome maps and disease-risk  
1044 association. *Science (New York, N.Y.)*, *366*(6469), 1134-1139. doi:10.1126/science.aay0793
- 1045 Osterwalder, M., Barozzi, I., Tissières, V., Fukuda-Yuzawa, Y., Mannion, B. J., Afzal, S. Y., . . .  
1046 Pennacchio, L. A. (2018). Enhancer redundancy provides phenotypic robustness in  
1047 mammalian development. *Nature*, *554*(7691), 239-243. doi:10.1038/nature25461
- 1048 Pattabiraman, K., Golonzhka, O., Lindtner, S., Nord, A. S., Taher, L., Hoch, R., . . . Rubenstein,  
1049 J. L. R. (2014). Transcriptional regulation of enhancers active in protodomains of the  
1050 developing cerebral cortex. *Neuron*, *82*(5), 989-1003. doi:10.1016/j.neuron.2014.04.014
- 1051 Peng, J., Sheng, A., Xiao, Q., Shen, L., Ju, X., Zhang, M., . . . Luo, Z. (2019). Single-cell  
1052 transcriptomes reveal molecular specializations of neuronal cell types in the developing  
1053 cerebellum. *Journal of Molecular Cell Biology*, doi:10.1093/jmcb/mjy089
- 1054 Pichaud, F., Walther, R. F., & Nunes de Almeida, F. (2019). Regulation of Cdc42 and its  
1055 effectors in epithelial morphogenesis. *Journal of Cell Science*, *132*(10)  
1056 doi:10.1242/jcs.217869
- 1057 Porter, F. D., Drago, J., Xu, Y., Cheema, S. S., Wassif, C., Huang, S. P., . . . Westphal, H.  
1058 (1997). Lhx2, a LIM homeobox gene, is required for eye, forebrain, and definitive  
1059 erythrocyte development. *Development (Cambridge, England)*, *124*(15), 2935-2944.
- 1060 Preissl, S., Fang, R., Huang, H., Zhao, Y., Raviram, R., Gorkin, D. U., . . . Ren, B. (2018).  
1061 Single-nucleus analysis of accessible chromatin in developing mouse forebrain reveals cell-  
1062 type-specific transcriptional regulation. *Nature Neuroscience*, *21*(3), 432-439.  
1063 doi:10.1038/s41593-018-0079-3
- 1064 Quinlan, A. R., & Hall, I. M. (2010). BEDTools: A flexible suite of utilities for comparing  
1065 genomic features. *Bioinformatics (Oxford, England)*, *26*(6), 841-842.  
1066 doi:10.1093/bioinformatics/btq033
- 1067 Ramírez, F., Ryan, D. P., Grüning, B., Bhardwaj, V., Kilpert, F., Richter, A. S., . . . Manke, T.  
1068 (2016). deepTools2: A next generation web server for deep-sequencing data analysis.  
1069 *Nucleic Acids Research*, *44*(W1), 160. doi:10.1093/nar/gkw257

- 1070 Ramu, A., Noordam, M. J., Schwartz, R. S., Wuster, A., Hurles, M. E., Cartwright, R. A., &  
1071 Conrad, D. F. (2013). DeNovoGear: De novo indel and point mutation discovery and  
1072 phasing. *Nature Methods*, *10*(10), 985-987. doi:10.1038/nmeth.2611
- 1073 Rinaldi, A., Defterali, C., Mialot, A., Garden, D. L. F., Beraneck, M., & Nolan, M. F. (2013).  
1074 HCN1 channels in cerebellar purkinje cells promote late stages of learning and constrain  
1075 synaptic inhibition. *The Journal of Physiology*, *591*(22), 5691-5709.  
1076 doi:10.1113/jphysiol.2013.259499
- 1077 Robinson, J. T., Thorvaldsdottir, H., Winckler, W., Guttman, M., Lander, E. S., Getz, G., &  
1078 Mesirov JP, -. e. (2011). Integrative genomics viewer. *Nature Biotechnology*, *29*(1), 24-26.  
1079 doi:10.1038/nbt.1754 [doi]
- 1080 Sanchez-Ortiz, E., Cho, W., Nazarenko, I., Mo, W., Chen, J., & Parada, L. F. (2014). NF1  
1081 regulation of RAS/ERK signaling is required for appropriate granule neuron progenitor  
1082 expansion and migration in cerebellar development. *Genes & Development*, *28*(21), 2407-  
1083 2420. doi:10.1101/gad.246603.114
- 1084 Sarropoulos, I., Sepp, M., Frömel, R., Leiss, K., Trost, N., Leushkin, E., . . . Kaessmann, H.  
1085 (2021). The regulatory landscape of cells in the developing mouse cerebellum. *bioRxiv*, ,  
1086 2021.01.29.428632. doi:10.1101/2021.01.29.428632
- 1087 Schmidt, E. M., Zhang, J., Zhou, W., Chen, J., Mohlke, K. L., Chen, Y. E., & Willer, C. J.  
1088 (2015). GREGOR: Evaluating global enrichment of trait-associated variants in epigenomic  
1089 features using a systematic, data-driven approach. *Bioinformatics (Oxford, England)*,  
1090 *31*(16), 2601-2606. doi:10.1093/bioinformatics/btv201 [doi]
- 1091 Stark, R., & Brown, G. (2011). DiffBind: Differential binding analysis of ChIP-seq peak  
1092 data.[computer software]
- 1093 Stoodley, C. J., & Limperopoulos, C. (2016). Structure-function relationships in the developing  
1094 cerebellum: Evidence from early-life cerebellar injury and neurodevelopmental disorders.  
1095 *Seminars in Fetal & Neonatal Medicine*, *21*(5), 356-364. doi:10.1016/j.siny.2016.04.010
- 1096 Su, X., Liu, X., Ni, L., Shi, W., Zhu, H., Shi, J., . . . Huang, Q. (2016). GFAP expression is  
1097 regulated by Pax3 in brain glioma stem cells. *Oncology Reports*, *36*(3), 1277-1284.  
1098 doi:10.3892/or.2016.4917
- 1099 Swanson, D. J., & Goldowitz, D. (2011). Experimental sey mouse chimeras reveal the  
1100 developmental deficiencies of Pax6-null granule cells in the postnatal cerebellum.  
1101 *Developmental Biology*, *351*(1), 1-12. doi:10.1016/j.ydbio.2010.11.018
- 1102 Takács, J., Zaninetti, R., Vig, J., Vastagh, C., & Hámori, J. (2008). Postnatal expression of  
1103 doublecortin (dcx) in the developing cerebellar cortex of mouse. *Acta Biologica Hungarica*,  
1104 *59*(2), 147-161. doi:10.1556/ABiol.59.2008.2.2

- 1105 Thompson, C. L., Ng, L., Menon, V., Martinez, S., Lee, C., Glattfelder, K., . . . Jones, A. R.  
1106 (2014). A high-resolution spatiotemporal atlas of gene expression of the developing mouse  
1107 brain. *Neuron*, *83*(2), 309-323. doi:10.1016/j.neuron.2014.05.033
- 1108 Trost, B., Walker, S., Wang, Z., Thiruvahindrapuram, B., MacDonald, J. R., Sung, W. W. L., . . .  
1109 Scherer, S. W. (2018). A comprehensive workflow for read depth-based identification of  
1110 copy-number variation from whole-genome sequence data. *American Journal of Human*  
1111 *Genetics*, *102*(1), 142-155. doi:10.1016/j.ajhg.2017.12.007
- 1112 Umeda, T., Takashima, N., Nakagawa, R., Maekawa, M., Ikegami, S., Yoshikawa, T., . . .  
1113 Osumi, N. (2010). Evaluation of Pax6 mutant rat as a model for autism. *PloS One*, *5*(12),  
1114 e15500. doi:10.1371/journal.pone.0015500
- 1115 Urbánek, P., Fetka, I., Meisler, M. H., & Busslinger, M. (1997). Cooperation of Pax2 and Pax5  
1116 in midbrain and cerebellum development. *Proceedings of the National Academy of Sciences*  
1117 *of the United States of America*, *94*(11), 5703-5708. doi:10.1073/pnas.94.11.5703
- 1118 Visel, A., Minovitsky, S., Dubchak, I., & Pennacchio, L. A. (2007). VISTA enhancer browser--a  
1119 database of tissue-specific human enhancers. *Nucleic Acids Research*, *35*(Database issue),  
1120 88. doi:10.1093/nar/gkl822
- 1121 Visel, A., Rubin, E. M., & Pennacchio, L. A. (2009). Genomic views of distant-acting enhancers.  
1122 *Nature*, *461*(7261), 199-205. doi:10.1038/nature08451
- 1123 Visel, A., Taher, L., Girgis, H., May, D., Golonzhka, O., Hoch, R. V., . . . Rubenstein, J. L. R.  
1124 (2013). A high-resolution enhancer atlas of the developing telencephalon. *Cell*, *152*(4), 895-  
1125 908. doi:10.1016/j.cell.2012.12.041
- 1126 Wang, V. Y., & Zoghbi, H. Y. (2001). Genetic regulation of cerebellar development. *Nature*  
1127 *Reviews. Neuroscience*, *2*(7), 484-491. doi:10.1038/35081558
- 1128 Wang, W., Mullikin-Kilpatrick, D., Crandall, J. E., Gronostajski, R. M., Litwack, E. D., &  
1129 Kilpatrick, D. L. (2007). Nuclear factor I coordinates multiple phases of cerebellar granule  
1130 cell development via regulation of cell adhesion molecules. *Journal of Neuroscience*,  
1131 *27*(23), 6115-6127.
- 1132 Weyer, A., & Schilling, K. (2003). Developmental and cell type-specific expression of the  
1133 neuronal marker NeuN in the murine cerebellum. *Journal of Neuroscience Research*, *73*(3),  
1134 400-409. doi:10.1002/jnr.10655
- 1135 Whyte, W. A., Bilodeau, S., Orlando, D. A., Hoke, H. A., Frampton, G. M., Foster, C. T., . . .  
1136 Young, R. A. (2012). Enhancer decommissioning by LSD1 during embryonic stem cell  
1137 differentiation. *Nature*, *482*(7384), 221-225. doi:10.1038/nature10805
- 1138 Wizeman, J. W., Guo, Q., Wilion, E. M., & Li, J. Y. (2019). Specification of diverse cell types  
1139 during early neurogenesis of the mouse cerebellum. *eLife*, *8* doi:10.7554/eLife.42388

- 1140 Yao, P., Lin, P., Gokoolparsadh, A., Assareh, A., Thang, M. W., & Voineagu, I. (2015).  
1141 Coexpression networks identify brain region-specific enhancer RNAs in the human brain.  
1142 *Nature Neuroscience*, *18*(8), 1168-1174. doi:10.1038/nn.4063 [doi]
- 1143 Yeung, J., Ha, T. J., Swanson, D. J., & Goldowitz, D. (2016a). A novel and multivalent role of  
1144 Pax6 in cerebellar development. *The Journal of Neuroscience: The Official Journal of the*  
1145 *Society for Neuroscience*, *36*(35), 9057-9069. doi:10.1523/JNEUROSCI.4385-15.2016
- 1146 Yeung, J., Ha, T. J., Swanson, D. J., & Goldowitz, D. (2016b). A novel and multivalent role of  
1147 Pax6 in cerebellar development. *The Journal of Neuroscience: The Official Journal of the*  
1148 *Society for Neuroscience*, *36*(35), 9057-9069. doi:10.1523/JNEUROSCI.4385-15.2016
- 1149 Yuen, R. K. C., Merico, D., Cao, H., Pellecchia, G., Alipanahi, B., Thiruvahindrapuram, B., . . .  
1150 Scherer, S. W. (2016). Genome-wide characteristics of de novo mutations in autism. *NPJ*  
1151 *Genomic Medicine*, *1*, 160271-1602710. doi:10.1038/npjgenmed.2016.27
- 1152 Zhang, D., Stumpo, D. J., Graves, J. P., DeGraff, L. M., Grissom, S. F., Collins, J. B., . . .  
1153 Blackshear, P. J. (2006). Identification of potential target genes for RFX4\_v3, a  
1154 transcription factor critical for brain development. *Journal of Neurochemistry*, *98*(3), 860-  
1155 875. doi:10.1111/j.1471-4159.2006.03930.x
- 1156 Zhang, P. G. Y., Yeung, J., Gupta, I., Ramirez, M., Ha, T., Swanson, D. J., . . . Goldowitz, D.  
1157 (2018). Discovery of transcription factors novel to mouse cerebellar granule cell  
1158 development through laser-capture microdissection. *Cerebellum (London, England)*,  
1159 doi:10.1007/s12311-017-0912-3
- 1160 Zhang, Y., Liu, T., Meyer, C. A., Eeckhoutte, J., Johnson, D. S., Bernstein, B. E., . . . Liu, X. S.  
1161 (2008). Model-based analysis of ChIP-seq (MACS). *Genome Biology*, *9*(9), R137.  
1162 doi:10.1186/gb-2008-9-9-r137
- 1163 Zhao, Y., Kwan, K., Mailloux, C. M., Lee, W., Grinberg, A., Wurst, W., . . . Westphal, H.  
1164 (2007). LIM-homeodomain proteins Lhx1 and Lhx5, and their cofactor Ldb1, control  
1165 purkinje cell differentiation in the developing cerebellum. *Proceedings of the National*  
1166 *Academy of Sciences of the United States of America*, *104*(32), 13182-13186.  
1167 doi:10.1073/pnas.0705464104
- 1168 Zhu, M., Need, A. C., Han, Y., Ge, D., Maia, J. M., Zhu, Q., . . . Goldstein, D. B. (2012). Using  
1169 ERDS to infer copy-number variants in high-coverage genomes. *American Journal of*  
1170 *Human Genetics*, *91*(3), 408-421. doi:10.1016/j.ajhg.2012.07.004
- 1171 Ziats, M. N., Grosvenor, L. P., & Rennert, O. M. (2015). Functional genomics of human brain  
1172 development and implications for autism spectrum disorders. *Translational Psychiatry*, *5*,  
1173 e665. doi:10.1038/tp.2015.153
